# Supplementary material for: Genome-wide identification and expression pattern of SnRK gene family under several hormone treatments and its role in floral scent emission in Hedychium coronarium
Source: PeerJ. 2021 Mar 10;9:e10883. doi: 10.7717/peerj.10883 (PMC7955670; doi:10.7717/peerj.10883)
Supplement: Supplemental Information 1 — Table S1: Sequences information of 20 SnRK Motifs. Table S2:Ka/Ks ratios of paralogous HcSnRK genes. Table S3: Cis-acting regulatory elements numbers found in the promoter region of HcSnRK genes. Table S4: Gene IDs of SnRK genes from Arabidopsis and rice. Table S5: List of primers used in the experimentations. [file peerj-09-10883-s001.xlsx]

## Sheet: Supplementary Table 1
Sequences information of 20 SnRK Motifs.
Name	Sequences
Motif1	YFQQLISAVDYCHSRGVYHRDLKPENL
Motif2	GYDGAKADIWSCGVILFVLLAGYLPFEDP
Motif3	ISVMRLVRHPNIVRLYEVMATKTKIYIVMEYVRGGELFDRI
Motif4	LJSRJLDPNPATRITIPEIMEHPWFKKG
Motif5	VLLGKYELGRLLGEGTFAKVYLARNVETGESVAIKVJDKEKILKHGLVEQ
Motif6	DGLLHTTCGTPAYVAPEVLSR
Motif7	LLDENGNLKISDFGLSALAEQ
Motif8	EGRKGPLAIAAEVFEVAPSLHVVEVRKAAGDTLEYEKFCKK
Motif9	NJMKLYRKILKGDYRCPPWFS
Motif10	LNAFDJISFSSGFDL
Motif11	TRFTSKEPASEIISKLEEIAKPLGFKVRK
Motif12	KGRLSEDEARR
Motif13	MEKYELLKDJGSGNFGVARLVRBKETKELVAVKYIERGKKI
Motif14	NDYEEPTQSMQSVDEIMQILEEARIPAES
Motif15	LRPGLKDIVWESQG
Motif16	LPRYLAVPPPDTSQQAKKIDEDILLEVTKMGFDKNQLVESLHNRIQNEAT
Motif17	PSERKWALGLQSRAPPREIMTEVLKALQDLNVSWKKIGHYNMKCRYFPGF
Motif18	WGSESDCSVASCPASFSDEKRQRPGMSRP
Motif19	GAGKESLVVKFEIQLYKTREEKYLLDLQRVSGPQLLFLDLCAAFLAQLRV
Motif20	FRHVRFYIEDDQLHSLDD

## Sheet: Supplementary Table 2
Ka/Ks ratios of paralogous genes
Paralogous gene 1	Paralogous gene 2	Ka	Ks	Ka/Ks	Duplicated type	Selection type
HcSnRK1.1	HcSnRK1.2	0.043	0.29	0.149	Segmental duplication	Purifying selection
HcSnRK2.6	HcSnRK2.9	0.037	0.273	0.134	Segmental duplication	Purifying selection
HcSnRK3.1	HcSnRK3.35	0.037	0.298	0.123	Segmental duplication	Purifying selection
HcSnRK3.5	HcSnRK3.11	0.08	0.5	0.16	Segmental duplication	Purifying selection
HcSnRK3.6	HcSnRK3.34	0.053	0.269	0.198	Segmental duplication	Purifying selection
HcSnRK3.17	HcSnRK3.30	0.098	0.42	0.233	Segmental duplication	Purifying selection
HcSnRK3.20	HcSnRK3.39	0.113	0.414	0.274	Segmental duplication	Purifying selection
HcSnRK3.23	HcSnRK3.27	0.032	0.338	0.095	Segmental duplication	Purifying selection
HcSnRK3.24	HcSnRK3.26	0.603	5.023	0.12	Segmental duplication	Purifying selection
HcSnRK3.28	HcSnRK3.32	0.082	0.309	0.267	Segmental duplication	Purifying selection
HcSnRK3.2	HcSnRK3.3	0.402	0.864	0.465	Tandem duplication	Purifying selection
HcSnRK3.14	HcSnRK3.15	0.405	1.722	0.235	Tandem duplication	Purifying selection
Ka, non-synonymous substitution rate; Ks, synonymous substitution rate.

## Sheet: Supplementary Table 3
Cis-acting regulatory elements numbers of HcSnRK genes in promoter region
Gene Name	ABRE	AuxRE	MeJA	ERE	SARE	GARE	LTR	Defense	Drought	Wound
HcSnRK1.1	1	1		2	2			1	1
HcSnRK1.2				1	1					1
HcSnRK1.3	2	1	3		1	1			1
HcSnRK1.4	1			1	2			2	1	3
HcSnRK2.1	3		2	3	1		4
HcSnRK2.2	2	1	2	7						1
HcSnRK2.3	2			11			1		1
HcSnRK2.4	1	2	3	3		1	1	1		1
HcSnRK2.5	8	1	6	1
HcSnRK2.6	1	1			2	1	1	2	2
HcSnRK2.7	6		6				2			1
HcSnRK2.8	1	1	2	2		1	1
HcSnRK2.9	1		1	4		1		1	1	1
HcSnRK2.10	3		1			2	2		1
HcSnRK2.11		1	1	5	1	1				2
HcSnRK2.12	1		1	3	3	1
HcSnRK2.13	12	1	4	1			1	1	3
HcSnRK3.1	3	6	5				1		2
HcSnRK3.2	2		4	1		1		1	1
HcSnRK3.3	1		2		1	1			2
HcSnRK3.4		1	1	3			1
HcSnRK3.5	1	1	4		1			1
HcSnRK3.6	7	1	5	1			1
HcSnRK3.7	3	1	3	1	1			1
HcSnRK3.8	3		1	3	1
HcSnRK3.9	1		1	4	2		2		1	2
HcSnRK3.10	2	1	2	2		3	2		2	1
HcSnRK3.11	3	1		1	1				2	1
HcSnRK3.12	4		7	2	1		1	1	3	1
HcSnRK3.13					1		1
HcSnRK3.14	5	2	3			1	2
HcSnRK3.15	2	1	1	4		1				1
HcSnRK3.16	4		1	2	2	1
HcSnRK3.17	1	1	2	2	4			1
HcSnRK3.18	3	1	1		1	1		1
HcSnRK3.19	4		1	2					4
HcSnRK3.20	3		1	3	1	4			1
HcSnRK3.21		1	1	1		1			3	1
HcSnRK3.22	1		3	1		1
HcSnRK3.23	1	2	2	4	1
HcSnRK3.24	1		1	4	1				1	1
HcSnRK3.25		1	2	1	2				2
HcSnRK3.26	4	2							1
HcSnRK3.27	4	1	3	2	1	1		2		2
HcSnRK3.28	3		4	1	2	2		1
HcSnRK3.29	3		2				2	1	1
HcSnRK3.30	1			2	3		1		1	2
HcSnRK3.31	4		2		1				1	2
HcSnRK3.32	1		1	5		1	1	3	1
HcSnRK3.33	3		5	1	2	2	1
HcSnRK3.34	3	2	4	3				1		1
HcSnRK3.35	4	3	6	1		2	1
HcSnRK3.36	1	2		3		2	1	1
HcSnRK3.37	1	1	2	3	2	2
HcSnRK3.38	3		4		1	2	1		1
HcSnRK3.39	3	1	4	5	2		1	1		1
HcSnRK3.40	3	1	2			1	3
HcSnRK3.41	3	2	3	2		1	1	1	2	1
HcSnRK3.42		1	2			1	1	2	1	1
HcSnRK3.43	2	2	1	1	1				5
ABRE elements are involved in the abscisic acid response, AuxRE elements are involved in auxin response, ERE elements are involved in ethylene response, SARE elements are involved in salicylic acid response, GARE elements are involved in gibberellin response, LTR elements are involved in low-temperature response.

## Sheet: Supplementary Table 4
Gene ID of SnRK genes from Arabidopsis and rice.
Name	Gene ID	Name	Gene ID
AtSnRK1.1	At3g01090	OsOSK1	Os05g0530500
AtSnRK1.2	At3g29160	OsOSK2	Os07g0194100
AtSnRK1.3	At5g39440	OsOSK3	Os03g0289100
AtSnRK2.1	At5g08590	OsOSK4	Os08g0484600
AtSnRK2.2	At3g50500	OsSAPK1	Os03g0390200
AtSnRK2.3	At5g66880	OsSAPK2	Os07g0622000
AtSnRK2.4	At1g10940	OsSAPK3	Os10g0564500
AtSnRK2.5	At5g63650	OsSAPK4	Os01g0869900
AtSnRK2.6	At4g33950	OsSAPK5	Os04g0691100
AtSnRK2.7	At4g40010	OsSAPK6	Os02g0551100
AtSnRK2.8	At1g78290	OsSAPK7	Os04g0432000
AtSnRK2.9	At2g23030	OsSAPK8	Os03g0764800
AtSnRK2.10	At1g60940	OsSAPK9	Os12g0586100
AtCIPK1	At3g17510	OsSAPK10	Os03g0610900
AtCIPK2	At5g07070	OsCIPK1	Os01g0292200
AtCIPK3	At2g26980	OsCIPK2	Os07g0678600
AtCIPK4	At4g14580	OsCIPK3	Os07g0687000
AtCIPK5	At5g10930	OsCIPK4	Os12g0603700
AtCIPK6	At4g30960	OsCIPK5	Os01g0206700
AtCIPK7	At3g23000	OsCIPK6	Os08g0441100
AtCIPK8	At4g24400	OsCIPK7	Os03g0634400
AtCIPK9	At1g01140	OsCIPK8	Os01g0536000
AtCIPK10	At5g58380	OsCIPK9	Os03g0126800
AtCIPK11	At2g30360	OsCIPK10	Os03g0339900
AtCIPK12	At4g18700	OsCIPK11	Os01g0824600
AtCIPK13	At2g34180	OsCIPK12	Os01g0759400
AtCIPK14	At5g01820	OsCIPK13	Os01g0206300
AtCIPK15	At5g01810	OsCIPK14	Os12g0113500
AtCIPK16	At2g25090	OsCIPK15	Os11g0113700
AtCIPK17	At1g48260	OsCIPK16	Os09g0418000
AtCIPK18	At1g29230	OsCIPK17	Os05g0136200
AtCIPK19	At5g45810	OsCIPK18	Os05g0332300
AtCIPK20	At5g45820	OsCIPK19	Os05g0514200
AtCIPK21	At5g57630	OsCIPK20	Os05g0208100
AtCIPK22	At2g38490	OsCIPK21-1	Os07g0637000
AtCIPK23	At1g30270	OsCIPK21-2	Os02g0178000
AtCIPK24	At5g35410	OsCIPK22	Os05g0334750
AtCIPK25	At5g25110	OsCIPK23	Os07g0150700
AtCIPK26	At5g21326	OsCIPK24	Os06g0606000
		OsCIPK25	Os06g0543400
		OsCIPK26	Os02g0161000
		OsCIPK27	Os09g0418500
		OsCIPK28	Os05g0476350
		OsCIPK29	Os07g0678300
		OsCIPK30	Os01g0759200
		OsCIPK31	Os03g0319400
		OsCIPK32	Os12g0132200
		OsCIPK33	Os11g0134232

## Sheet: Supplementary Table 5
Gene Name	Primer 5'-3'
Clone-HcSnRK2.2-F	CTCGAGGAGTGGACGAAGATGGAG
Clone-HcSnRK2.2-R	GCAACAAACATACAATACAACATCAGATTGAGC
Clone-HcSnRK2.9-F	TATTGGAGCG ACGACCGA
Clone-HcSnRK2.9-R	CTGCACAATCGAGAGAGC
qRT-PCR-HcSnRK1.1-F	CTGAGGTCCTTAAAGCTCTACAAGAGC
qRT-PCR-HcSnRK1.1-R	CAACAATGGTCGTCTCATCACTGAAGC
qRT-PCR-HcSnRK1.2-F	CGACGAGTCAGCCATTGTTGAAGCTG
qRT-PCR-HcSnRK1.2-R	CAAGGAAGGCAGCACACAAGTCCAG
qRT-PCR-HcSnRK1.3-F	CTACTTGCACGTGGACAATCGTTTCC
qRT-PCR-HcSnRK1.3-R	CTGTTGCTCCATGTAACCAGGTTGAC
qRT-PCR-HcSnRK326.60-F	CTACGAAACAGAGAATGATCAAGCTTCAC
qRT-PCR-HcSnRK326.60-R	CGACTTCAGAGTCGATATCAGCTTCAAG
qRT-PCR-HcSnRK275.28-F	GCATAGAAGAAGTCATGGCTATAGTTC
qRT-PCR-HcSnRK275.28-R	CAATGTCATCAAGATCCGTGTCTCC
qRT-PCR-HcSnRK843.18-F	GATCAGTCTTCACAAAGTGTGGAAGAGA
qRT-PCR-HcSnRK843.18-R	CTTCAGCGTCGATGCCAGCTTCAAG
qRT-PCR-HcSnRK782.12-F	GTTCCACTGGTTGCCTCCAGAG
qRT-PCR-HcSnRK782.12-R	GTGTCTTGTTCGCCTTCCTGCTC
qRT-PCR-HcSnRK191.34-F	GAGAATTGTAGGTGATGCACGGATCC
qRT-PCR-HcSnRK191.34-R	CACCACTTGCATGGACTTCCTTCACTC
qRT-PCR-HcSnRK407.47-F	GGAGATTCTAACAGAAGCCAGGACAC
qRT-PCR-HcSnRK407.47-R	CGCCACTAGCATGTAATGCCTTCAC
qRT-PCR-HcSnRK54.19-F	CAATGCTCCGACATACTCCACGCAG
qRT-PCR-HcSnRK54.19-R	CTTGAAGTCACCACTAGCATGAACCG
qRT-PCR-HcSnRK39.21-F	GCGATGAGATAATGCAGATCTTGGC
qRT-PCR-HcSnRK39.21-R	CAACGTCGAGGTCTGTATCGGAG
qRT-PCR-HcSnRK25.205-F	CAATGAGCAACCAGTACGAGGAGC
qRT-PCR-HcSnRK25.205-R	CTCTCCATATCATCATCGTCGAGATC
qRT-PCR-HcSnRK479.26-F	GTGATGCAATAATGCAGATCTTAGCCG
qRT-PCR-HcSnRK479.26-R	GCATAGATCATCTCTCCACTGCTCTC
qRT-PCR-HcSnRK57.125-F	CGACGAGCAACCAATACGAGGAG
qRT-PCR-HcSnRK57.125-R	CAACGTCTAGATCGAGATCAGAGTCC
qRT-PCR-HcSnRK163.43-F	GCCAAAGAAGATGAATTGGATGGCG
qRT-PCR-HcSnRK163.43-R	GCATATATTCTCCACTAGCATGAACCTC
qRT-PCR-HcSnRK102.99-F	GCAACCGAGGTATTCCAAGTCGCTC
qRT-PCR-HcSnRK102.99-R	CTCAGATATCCAGACAACATCCTTAAGGC
qRT-PCR-HcSnRK114.20-F	GCACCTATCTGTAGCGACAGAGG
qRT-PCR-HcSnRK114.20-R	CCAGACTATATCTTTGAGGCCTGAAGAG
qRT-PCR-HcSnRK158.15-F	CCTTCGATGGTGGTCGTTGAG
qRT-PCR-HcSnRK158.15-R	GGAGGCGACTCGTACATGAGATC
qRT-PCR-HcSnRK247.6-F	GAACCTGCTCACTGGCAAGTGC
qRT-PCR-HcSnRK247.6-R	CACCTCGTGAAGCTCCACGATATTG
qRT-PCR-HcSnRK259.98-F	GTCTGCTCAGGTATTTGAGCTCAGTC
qRT-PCR-HcSnRK259.98-R	GTTGAGCTCTGGCATGGACTCTG
qRT-PCR-HcSnRK279.1-F	GTAGCACCCTCATTGCATATGGTGG
qRT-PCR-HcSnRK279.1-R	CTCTCGGATCCGCTAGTTTCCAC
qRT-PCR-HcSnRK280.50-F	CCATTGACGCAGAGATCTTTGAGGTC
qRT-PCR-HcSnRK280.50-R	GTTGGTGCTCTCCTTGCCATTCC
qRT-PCR-HcSnRK32.21-F	CGGTGGTGGAGTTCACAAACATCG
qRT-PCR-HcSnRK32.21-R	GGCCAGACTATGTCCGTTAGC
qRT-PCR-HcSnRK33.46-F	GGTCACTCCATCATTCCATTTGGTTGAG
qRT-PCR-HcSnRK33.46-R	CTCCTTGCCATGACCAGATAATGTCC
qRT-PCR-HcSnRK369.81-F	GCGATCGTTGCTGTCGAAGTACGAG
qRT-PCR-HcSnRK369.81-R	CTTGATCTGGTCGTCGAGGTTGAGC
qRT-PCR-HcSnRK48.119-F	GTTCTGTTCGAGCGTGTAGTGGAC
qRT-PCR-HcSnRK48.119-R	GGTTGAGCTCGAACACCTCTATCC
qRT-PCR-HcSnRK685.16-F	GGTGGAATTGTAAAGATGGAGTCCTTG
qRT-PCR-HcSnRK685.16-R	CAATGTCAGTAAGAGCTGGCCTAACTTC
qRT-PCR-HcSnRK79.41-F	CATATTCACAGTGGCGCCTCCAGTC
qRT-PCR-HcSnRK79.41-R	GGACTTCGTCGGATGATGAAGTCAAG
qRT-PCR-GAPDH-F	TAACATCATTCCCAGCAGCACTG
qRT-PCR-GAPDH-R	GAGCCTGACAGTGAGATCCAC
pEAQ-GFP-HcSnRK2.2-F	CCACCGGTATGGAGAAGTATGAGCTTGTGAAGGATC
pEAQ-GFP-HcSnRK2.2-R	CCACCGGTATTTACCAATTGCATATATTCTCCACTAGCATG
pEAQ-GFP-HcSnRK2.9-F	CCACCGGTATGGAGGAGAGGTACGAGTCGC
pEAQ-GFP-HcSnRK2.9-R	CCACCGGTCATTGGTGCCAAAAAGTCACCACTG
VIGS-HcSnRK2.2-F	AAGGAAGTTTAACTCCAGGATACTTGTTGCTGAC
VIGS-HcSnRK2.2-R	AACCACCACCACCGTGTCGACAACGACGGAACAATG
VIGS-HcSnRK2.9-F	AAGGAAGTTTAAGCGTATCTCCAGAATGCAGGC
VIGS-HcSnRK2.9-R	AACCACCACCACCGTGTCACCACTGCTATCGACTTCAG
