# Supplementary material for: Genome-wide identification and expression pattern of SnRK gene family under several hormone treatments and its role in floral scent emission in Hedychium coronarium
Source: PeerJ. 2021 Mar 10;9:e10883. doi: 10.7717/peerj.10883 (PMC7955670; doi:10.7717/peerj.10883)
Supplement: Supplemental Information 2 [file peerj-09-10883-s002.xlsx]

## Sheet: Table S6
HcSnRK3.34	MAGENRSSGSGGGGGSNGGSRGGGGRGRALLLGRYEVGRLLGHGTFAKVYHARHAETGENVAIKVLDKERILQSGLAAHTKREIAILRRVRHPNIVHLHEVMATKSKIYFVMELVRGGELFARVSKGRLPEPAARRYFQQLISAVAFCHARGVYHRDLKPENLLLDDRGDLKVSDFGLSAVSDQMRQDGLFHTFCGTPAYVAPEVLARKGYDGAKVDIWSCGVILFVLMAGYLPFHDPNVMLMYRKIQKGEFRSPRWFSAELLRLLSRLLDTNPATRITIPEIMDNRWFKKGFRQVRFYLEDDKFHSLDDVAPTQSPPPPPSSDDSESDSDSNFSPSCSSSSNWGRRQGLGRLPRPASLNAFDIISFSPGFDISGLFEEQGEEARFVSGQPVDRIISKL…
HcSnRK3.5	MGSVGRTRVGKYELGRTLGEGNFAKVKFAKDVETGESVAIKIFDKDKILRHKMVGQIKREISTMKLIRHPNVIRMHEVIASKTKIYLVLEFVDGGELFDKIARNGKLKEDEARKYFQQLINAVDYCHSRGVFHRDLKPENLLLDATGVLKISDFGLSALPQQVREDGMLYTTCGTPNYVAPEVIKDKGYDGAKADIWSCGVILFVLMAGYLPFEETNLVSLYKKVTYHNAHSDISYETGLPLMLVVNASQIFKAAFSCPNWFSTSAKKLIKRILDPNPQTRIAIPQIIENEWFKKGYQPPQFETADVDPDDVDTIFDESEEATNLVVERGKEKPDAMNAFDLISTSQGLNLGTLFEKQMGLVKRETRFTSKLPANEILWKIEEVCKPMGFDVKKQNYKL…
HcSnRK2.13	MEKYEVVRDIGFGNFGVAKLMRHKETKELVAMKYIERGRRIDENVAREIINHRSLRHPNIIRFKEVVLTPTHLAIVMEYAKGGELFDRICDAGRFSEDEARYFFQQLISGVSYCHFRQICHRDLKLENTLLDGSPAPRLKICDFGYSKSSLLHSRPKSTVGTPAYIAPEVLSPREYDGKQADVWSCGVTLYVMLVGAYPFEDQNDPKNIKKTIRKIMSVQYKIPDYVHISQDCKQLISRIFVANPTKRITINEIRSQAWFMRNLPRELTETTQALYYKRDINAPTFSTQSVDEIMEILTEARTLPKPIRSLSNYGWSHDESEGEDDNNKEENVDEEEEEDDEYEKTVKALHASGEFKIG
HcSnRK2.12	MEKYELVRDLGSGNFGVARLLRNKETKELVAIKYIPRGLKIDENVAREIINHRSLRHPNIIRFKEVILTPTHLGIAMEYAAGGELFERICSAGRFSEDEARYFFQQLICGVSYCHFLQICHRDLKLENTLLDGSPAPRLKICDFGYSKSSLLHSRPKSTVGTPAYIAPEVLSRREYDGKMADVWSCGVTLYVMLVGAYPFEDPNDQKNFRKTIGRIVAVQYKIPEHVHISQDCRQLLSRIFVANPTRRITIREIRNHPWFLKNLPRELAEASQAQYYKRDNSAPTYSLQNEEEIMRIVGDARIPPSSSTPVAGFGWVEEDEDEGKQEKEKDEEEEEEEDEYDKRVKEVHASGEFPLPD
HcSnRK2.10	MDRAAMAVGPAMDLPIMHDSDRYELVKDIGSGNFGIAKLMRDKQTKELVAVKYIERGEKIDENVKREIINHRSLRHPNIIRFKEVILTPTHLAIVMEYASGGELFERICNAGRFSEDEARFFFQQLISGVSYCHSMQVCHRDLKLENTLLDGSTAPRLKICDFGYSKSSVLHSQPKSTVGTPAYIAPEVLLKKEYDGKIADVWSCGVTLYVMLVGAYPFEDPEEPKNFRKTIQRILSVQYSIPDYIHISPECHHLISRIFVANPAARITIPEIRNHKWFLKNLPADLVDDNTTSNQYEEPDQPMQSIDEIMQILAEATIPAAGTRGLNQYLTDSLDIDDDDMEDLDSDLDLDVESSGEMVYAI
HcSnRK2.3	MATHRAALTVGPAMDLPIMHDRNRYELVRDIGSGNFGIARLMRDKQTKELVAVKYIERGEKIDENVKREIINHRLLRHPNIIRFKEVILTPTHLAIVMEYASGGELFERICNAGRFSEDEARFFFQQLISGVSYCHSMQVCHRDLKLENTLLDGSVAPRLKICDFGYSKSSVLHSQPKSTVGTPAYIAPEVLLKKEYDGKIADVWSCGVTLYVMLVGAYPFEDPEKPKNFRNTIECILNVQYSIPENIPISPECQHLISSIFVANPATRISIPEIRNHEWFLKNLPADLMDDNAMSSQYEEPDQPMQSSDEIMQILAEATIPAVGTSGLNQHLFGSLELDDDDMEDFYSDTDLDVESSGEMIYAM
HcSnRK2.5	MKYIERGQRIDENVAREIMNHRSLRHPNIIRFKEVVLTPTHLAIVMEYAAGGELFERICDAGRFSEDEARYFFQQLISGVCYCHDRQICHRDLKLENTLLDGSPAPRLKICDFGYSKSSLLHSRPKSTVGTPAYIAPEVLSRREYDGKQADIWSCGVTLYVMLVGAYPFEDQRDPKNFRKTIGRIMSVQYKIPDYAHVSQDCKQLISRIFVANPTRRITIKEMKSHPWFLKNLPRELTEPAQAVYYKRDNNAPTYSTQSVDEIMEILSEARTVLKPSRSIPGFGWPEEESEDEDKEKSEENDDDDDDDYEEDDEYDKTVKAVHASGDFKGQLN
HcSnRK3.43	MLWSSERSWQPRPASSSSWSTFAGGELFASVLRGPLPEDKARRCFRQLICAVEFCHSLGVSHRDLKLENLLLDNNGDLKVADFGLSALPEQRRHDGLLHTQCGTPMYVAPEVLRSHGYEGSKADVWSCGVILYVLLASFLPFQEENLMRMYCKVLKADYQIPPWFSGDARRLISLLLVANPEKRISIPAIKSHPWFKKEAFPQEPRIPPPPTPVEEDEPKPGSPKFYNAFKLISTFSSGFNLSSLFENRRPAGTMFTSRSPTAAIVERLERAGQELGFNACMVKPYKVKMEKKSRNEWKGQLELVVTAEVFEAADGMAVVEFSKDSGEASEFAKFCEEKIRMRLKDIVWAWQGAAGTDGGEE
HcSnRK3.20	MDMVKDGGGGGEGMRVLGKYELGKMLGEGNFGKVRYALDVDFGRPYAIKILDRRRIQSLKIADQIKREIATLKLLKHPNVVRLYEVSASKTKIYMVLEYVNGGELFDRIVSSQNVKEGSFFQQLIDAVSYCHDKGVYHRDLKPENVLVDAKGNIKVSDFGLSALPQHFGNDGLLHTTCGSPNYIAPEVLANRGYDGARSDIWSCGVILYVILTGSLPFDDRNLAVLYQKIIRGDTKFPKWLSSGAQDILKRILDPNPMTRINVTGIKAHDWFNQDYTSVVPIDEEEDLCLDDTPCSIKEHNKSDDNGNTPTHINAFQLIGMSSSLDLSGFFEKEDVSERKIRFASDRPPKELYEKIEDIVTEMGFQVQKGHGKLKVIEKCKASKCPGRFESLSVAAQVF…
HcSnRK3.1	MAEAAAPEMSLTEKRRNKDTGGGGLLLGRFDVGRLLGAGSFAKVYVARDVRTDELVAIKALDKEKIVKGGFAAHIKREIAILRRVRHPYIVQLFEVMATKTKIYFVMEYVRGGELFGGVAKGRLLEDTARRYFQQLISAVSFCHARGVFHRDLKPENLLLDDNGDLKVSDFGLSAVAEQMHVDGLLHTFCGTPAYVAPEVLSRRGYDGAKVDVWSCGVILFVLMAGYLPFHDRSIVAMYRKIHKGSFRCPRWFSQDLVQLLHRLLDVNPQSRATIPEIMENPWFRKGFRHIRFYIEDNQLHSFNDSDSEDEQLQSNQPKPDETYESGSESDSSVASCPASFSDEPFQCHPLLRPPSLTAFDIISFSRGFDLSGLFEEKGEMTRFLSKEPVSAIVSKLED…
HcSnRK3.10	MEFRGKVVMQKYDLGRLLGKGTFAKVYYARNISDGQSVAIKIIDKEKVVKAGLMEQVKREVSVMRLIRHPNIVYLFEVMASKTKIYFVMEYAKGGDLFSKVAKGKVDVGDARKYFRQLISAVDYCHSRGIYHRDLKPENLLLDENDNLKVSDFGLSALVDSEKLDRLLHTTCGTPAYVAPEVINGMGYDGANADIWSCGVILFVLMAGYYPFQDSNLMEMYKKIEKGEFKCPHWFSPSTRKLVSKILDPNPSTRISIVKIRETKWFRKGLDGRKMKIKQPTEDDTHVEAATAYNNPESNAAEEKNDSAKITNLNAFDIISLSAGFNLSGLFEENQNKQTWFTSKKSSSAIISKLYEVAKMLKFKVKKKDGGIVKMESLKEGKDGLAIDFEIFEVSPSLY…
HcSnRK3.6	MPATRRHRNEKKLPKLEVRTRSPSSLMADESSSRSDGGNGGSQRGGGGRGLLLGRYEVGRLLGHGTFAKVYHARHAGTGESVAIKVLDKEKILQSGLAAHTKREIAVLRRVRHPNIVHLHEVMATKSKIYFVMELVRGGELFARVAKGRLPETAARRYFQQLISAVAFCHARGVYHRDLKPENLLLDDRGDLKVSDFGLSAVSDQMRQDGLFHTFCGTPAYVAPEVLARKGYDGAKSDIWSCGVILFVLMAGYLPFHDPNLMLMYRKIQKGEYRCPRWFSADLVRLIFRLLDTNPSTRITIHEIMDNRWFKKGFREVKFYLEDDKFHSLDDDAPTQSPQPPPSSDDSESDSDSNFSLSTSSSSNCSRRQGLGRLPRPASLNAFDIISFSPGFDISGLFE…
HcSnRK3.21	MERGNKGNVLMKKYEVGRLLGKGTFAKVYYARDIKTSQCVAIKVIDKEKALKVGLIDQIKREISVMRLVRHSNVLELYEVMATRSKIYIVLEYAKGGELFRKVAKGKLKEDAARRYFQQLLTAVDFCHSRGVCHRDLKPENLLLDENGKLKISDFGLSALAESKRQDGLLHTTCGTPAYVAPEVMRRKGYDGAKADIWSCGVILFVLMAGYLPFHDSNLIAMHKKIGRSEYRCPNWFPSDVRRLLACILDPNPATRISIEKIMENPWFRKGLDGVTRNGKATQEVDQPDGDEVLNCPNIKMTDDQELGKLMNLNAFDIISLSAGFDLSGLFEETTDKREARFISAQPASNIISKLEEVAKYLKLKIQKKGHGLLQMEGAKSGKGSLAIDAEIFEVTPSF…
HcSnRK3.31	MEEVVAASPATSVEGRSVLQGRYEIGRVIGQGTFAKVHLARNILTGEGVAIKVVGKEKVIQVGMMEQVKREISVMKMVRHPNIVELHEVMATRSKIYFAMELVRGGELFTKVTRSGRLREDAARRYFRQLVSAVDFCHGRGVYHRDLKLENILLDEQGDLKIADFGLSAFAEHVRPDGLFHTACGTPAYVAPEVVGQRGYDGAKADLWSCGVILFVLLAGFLPFQDENILAMYKKIRRGDFRCPPWFSSDARRLVTKLLDPNPKTRITVDRLTGSPWFKKSTIPKSVTATPPPSVNLESVLSGDKEPAEKEGEEQESLNAFHLISFSDGFDLSPLFLGGERREKVMRFATNEPASDVVSRFENFSARAAAKCRVTESCSAGLKLEGEERGRMGKMTISV…
HcSnRK3.7	MAESIVGEEAPSKVIFGNYELGCLLGRGSSAKVYHARHLPSGNSVAIKVFPNPRRPAGHPASASDSFIREISALRRLRHRHIVRLHEVLASRSKVYLVLDHAKGGELLSRIDDHGRLSEDLARRLFHQLISAVAYSHSRGVFHRDLKLENLLLDEAGDLKVADFGFAALRRSSDGDHLLRTQCGTPTYVSPEILMGKRTNGYDGAKADIWSCGVILFVLVAGYLPFNGSNLMSLYRKIYRGHHRCPRWAPPDLCRFIARLLDPDPATRVSIDGILLDPWFAQGLDATQRAALMRPFFDEQKPRHHAGAGPLNAFDLIAFSYGLDLSGFFVEGETSDRERFTTFEPVDRVLDRVERVGKGEGFVVRKEEEEEEKGAVVSTVVEGQNGELIVRVEVYRLAG…
HcSnRK3.26	MRLGYCHDMGVYHRDLKPENVLVDAQRNIKISDFGLSALPQHLGNDGLLHTTCGSPYYIAPEVLSNRGYDGARTDIWSCGVILYELLTGGLPFDDRNLAVLYHKISRGDTKIPKWLSPGAQNILRRILDPNPITRLNAAEIKADEWFKQDYVPAVPNDDDNDEEIILHNSVPSKEHNAAEENATSPSHVNAFQLIGMSSSLDLSGFFEKEDVSERKIRFTSNYSPNVLFERVVDIVGQMDLQIQKAPGKLKVVQKLLDSKKPKNTGSLCVWIEVFELNPSLFLVELMKSQGDSLLYRKMCSKLSGELGVAKDERLLERQMVTMEEGEELLRCDTG
HcSnRK3.18	MVVRRVGKYEVGRTIGEGNFAKVKFAQNTETGESVAMKVLDRATIIKHNMVDQIKREISIMKLVRHPHVVRLHEVLASRTKIYIILEYITGGELFDKIIRHGKLSEAESRRYFQQLIDGVGYCHSKGVYHRDLKPENLLLDSQGNLKISDFGLSALPAQGVSLLRTTCGTPNYVAPEVLGHKGYNGAVADAWSCGVILYVLLAGYLPFDEIDLSALYSKIDKAEFSFPSWFSDGSKSLIRRILDPNPETRMRMEDIRNDEWFKKNYVPVSPLEAEEVNLDDIYAVFDESEVNEQSRNEELGPLNLNAFDLIILSEGLNLAALFDRRQDFAKHITRFLSRKSAKVVLSSMEVVAQSMGFKTHIRNYKMRVEGLTENRTAHLSVVIEIFEIAPSFLMVDIQ…
HcSnRK3.16	MMVGKYELKRTIGEGMFAKVKLGVEVESNATVAVKVIDKKTVIENNLMYQVKREISTMKLLDHPNIVKIHEVIATKTKIYLVMEYVAGGQLSDKLAYLKKIDAKEARKYFHQLIDAVDYCHSRGVYHRDLKPENLLLDSKGNLKVSDFGLSGLKKPGDLLSTACGSPSYVAPEVITHKSYDGAAADIWSCGVVLFELLAGFLPFRDRSLTNLYRKIAIADYIFPVWFTDAQRKLISKILEPLPTKRARVSDILEEEWFKVDYRQNVGLDCDENLSQSSSGETQNHGENNSWRFINAFQLIAMSNDLDLSGLFQEEKIKFGSEHPVDETFAKIEVAAKDVDLSVKRINNSRVRLHVSKGLSRSRSHYSLSAEVVEVTPKYCVIEVSKSAGDLGSYKEFCK…
HcSnRK3.42	MDNQQPTVDCAAAAAAAKRRHQEVLLGKYELGCLLGRGTFAKVYLARSVSDGAAVAVKILDKAEMVATGMAHSVLTEVAAMRRLSHPNILKIHEVLATRSKIFLVMEHAPGGDLLSRIARRRLPEHAARRYFHQLVSALHYCHARGVTHRDVKPQNLLLDRDGNLKVSDFGLAALPDRLRDGRLHTACGTPAYTAPEVVRRKGYDGAAADAWSCGVILFVLLAGSLPFDDANLAVMYRRIHRRDYEIPPGISTPARRLLVRLLDPNPDTRMTMAALIDHPWLKRSLSLDSQLNTHPLAAAHDPQLALAMNAFDIISLSSGLDLSPLFDDAKAKKERRFTSTHSIDKIMDRVQLTGSKLGLVVETKKAAAMAALAGGWGPTLSVEVSEVASQLRLVEMRL…
HcSnRK2.7	MEKYEVLRDIGSGNFGVAKLVRDVRTKELFAVKLIERGQKIDEHVQREIMNHRSLKHPNIVRFKEVLLTPTHLAIVMEYAAGGELFERICNAGRFSEDEARFFFQQLISGVSYCHCMQICHRDLKLENTLLDGSTAPRLKICDFSYSKSSVLHSQPKSTVGTPAYIAPEVLSRKEYDGKIADVWSCGVTLYVMLVGAYPFEDPDDPKNFRKTLGRILSVQYSIPDYVRISMECRHLLSQIFVANPEQRFTVPEIKTHPWFLKNLPIELTDGYQNSPATIDTLADTTQSIEEVMAIVQEARKPSEATKPGHGHFIGDGSLDLDDIDGDTDLDDIEMSGDFVCSL
HcSnRK3.39	MVKEGGGGEGMRVLGKYELGRTLGEGNFGKVKYALHVDSGHPYAIKILDRRRIQSLKITDQIKREIATLKLLKHPHVVRLYEVSASKTKIYMVLEYVNGGELFDKIALKGRLSEGEGRKLFQQLIDAVSYCHDKGVYHRDLKPENVLVDAKGNVKVSDFGLSALPQHLGNDGLLHTTCGSPNYIAPEVLSNRGYDGARSDIWSCGVILYVILTGSLPFDDRNLAVLYQKIVRGDTKFPKCLSPGAQGILRRILDPNPITRINVAGIKEHVWFKQDYTPAVPIDDEEDLCLDNAPCPVKEHNEPDDSGNTPTHINAFQLIGMSSSLDLSGFFEKEDVSERKIRFTSNHSPKELYEKIEDIVTEMGFQVQKGHGKLKVIEKCKASKSPTRPESLSVSAQVF…
HcSnRK3.38	MGLKKVGKYDVGETIGQGTFAKVKVAVNTETRGTVAIKVLAKNTILEHKMVHQIKKEISIMKIVRHPNIVKLHEVLASSTKIYIILELAAGGELFDKIVHQRRLSENESRRYFQQLIDAVDYCHSKGVYHRDLKPENLLLDYQGNLKVSDFGLSALPQKGVGLLRTTCGTPNYVAPEVLGQQGYDGSAADIWSCGVILFVLMAGYLPFNEVDLPTLYKKINAAEFTCPTHISLGAKSLIHRILDPNPKTRISIEGIRSDAWFQRNYIPIRLGVEEEDNLDDIDAVFNDIEDQYVTEQVRDNDTGPLIMNAFEMITLSQGLNLSALFDRHQDFVKRQTRFISRQPANTIVATLEAVAASIGLKKVHSQKFKMRLEGLSSDKIHQLAVVLEVFEVAPSLFM…
HcSnRK2.2	MEKYELVKDLGSGNFGVARLMRNKDTNEFVAMKYIPRGQKINENVAREINNHRSLCHPNIIRFKEVLLTPTHLAIVMEYAAGGELFERICLAGRFSEDEARFFFQQLICGVSYCHVMQICHRDLKLENTLLDGNPAPRLKICDFGYSKSSVLHSRPKSTVGTPAYIAPEVLSRREYDGKMADVWSCGVTLYVMLVGAYPFEDLEDPKNFKKTMARIVSVQYKIPEYVHISKDCRQLLSRILVADPSKRITISEIRKLPWFLKNLPRELTEVAQSVYYKRDTTNLSYSPQSGEEIMSIVEEARSIVPSLSTALSDLGFAKEDELDGGLQMKPETKEEEEEEDDDDDEYEKRVKEVHASGEYMQLVN
HcSnRK2.4	MEKYELLKDIGYGNFGVTKLMRNKETKELVAAKYLPRGETIDDKVVREIVNHRSLRHPNIIQFMEVMLTPTHLVIVMEYAAGGELFERICSTGRFSEDEARYFFQQLICGVSYCHQLQVCHRDLKLENTLLDGSPSPKLKICDFGYSKSTLLHSQPKSAVGTPAYIAPEILAWKEYDGKMADVWSCGVTLYVMLVGAYPFEDPNDTKNFRKTIERIRAVRYKIPPHVHISSDCKHLLSQIFVANPARRITMQEIKNHIWYLKNLPRELSEAAQANYGYLRDNNVPTSSTGCLQSVIEIMQIVKEARIPPPVSQSDDEINWENDEQEEQEGEQDTSKNKEEQQHSTQKGKEHERSAHKGNDEQESSARNRKEEEH
HcSnRK3.30	MGKEAEQARSEVRKLVFGKYEMGRVLGKGTFAKVYYGRELSSGESVAIKVIDKEQVRRQAGMMEQIKREIVVMRLVRHPNVVELREVMATKTRIFFVMEYVRGGELFARVARGRLPEDQARRYFHQLISAVDFCHSHGVFHRDLKPENLLLDRLGDLKISDFGLSALPEQLRHDGLLHTQCGTPAYVAPEVLRRRGYDGAKADLWSCGVILFVLLAGFLPFQDESLTQMYRKVLKAKYQIPPWFSGDARCLVSRLLVVNPDKRISIPSILQDPWFKKRSFRPPAIQISNLPQPPVPPAEEEETKPATPRFYNAFELISSMSFGFDLSGLFESQRTTGTVFTSLLPAATILERLEKIGRELGLAVMRTKPFRVRIEGTAEGRKRRLEVEAEVFEAAVGVA…
HcSnRK3.17	MGKEAEQARGEVRRLLFGKYEIGRVLGKGTFARVYYGRELSSGESVAVKVIDKEQARRQAGMMEQIRREIKVMRLVRHPNVVDLREVMATKTRIFIAMEYVRGGELFAHVARGRLPEDQARRYFHQLISAVDFCHSHGVSHRDLKPENLLLDDRGDLKISDFGLSALPEQLRHDGLLHTQCGTPAYVAPEILRRRGYDGAKADLWSCGVILFVLLAGFLPFQDESLMQMYQRVFKADYRIPPWFSGEARRLVSRLLVVNPDKRISIPAILQFPWFKKGSFRPSPLQISNLPPPPPTQAEEEAKAVTPRFYNAFELISSMSSGFDLSGLFESQQRAATVFTSRSPAATIVERMETVGRELGLAVMRTKSFRVRMEGTAKGWKRRLAVEAEVFEAAAGVAV…
HcSnRK3.29	MAEPAASKAATEQEAMGKKGGGGRSKRLLLGRFEVGKLLGSGTFAKVYVGRNVRTDELVAIKALDKESILKGGLVAHIKREISILRRVRHPYIVELFEVMATKTKIYFIMEFVGGGELFSMVSKGRLLEDTGRRYFQQLISAVAFCHARGVYHRDLKPENLLLDEKGDLKVSDFGLSAVANQIRSDGLFHTFCGTPAYVAPEVLSQRGYDGAKVDIWSCGVILFLLMAGHLPFYDRSVVAMYRKIYRGVFRCPRWFSQELIDLLHRLLDVNPQTRITIPEIMENSWFKKGFRHIRFYIEDNELHSITEPEEDGQSQNDPYESGSESDCSVASCPASFSDDHREPLGLPRPQSLTAFDIISFSEGFDLSGLFEETGEMTRFLSKESAPKIVAKLEEIANV…
HcSnRK1.1	MHPHIIRLYEVIETPSDIYVVMEYVKSGELFDYIVEKGRLHEDEARRFFQQIISGVEYCHRNMVVHRDLKPENLLLDSKCNVKIADFGLSNVMRDGHFLKTSCGSPNYAAPEVISGKLYAGPEVDVWSCGVILYALLCGTLPFDDENIPNLFKKIKGGIYTLPSHLSALARDLIPRMLVVDPMKRITIREIREHAWFKTRLLRYLAVPPPDTSQQAKKIDEDIIAEVTKMGFDKNQLVESLHNRIQNEATVSYYLLLDNRFRATSGYLGGDFQETMDYNLLNRSSSDVPAPHRLPGYMEQQGISSRAHFPSERKWALGLQSRAPPREIMTEVLKALQELNVCWKKIGHYNMKCRYFPGFPDTEGMHNNSLRSNHGFSDETTIVETNGTGKESIVVKFEI…
HcSnRK3.40	MADHVAGAPPPAKIIFGTYELGRLLGRGASAKVYHARHLPSGHSVAIKVFPKPRRTAAASASSADSFIREISALRRLRHRHILRLREVLASRSTVYLVLDFAKGGQLFSCVEDRGRLPEDLSRRLFRQLISAVAYSHSRGVFHRDLKPENLLLDDAGDLKVSDFGFAALRPSSDRDQLLHTQCGTPAYVSPEILSGKQRDGYDGAKADIWSCGVILFVLNAGYLPFNDPNLISLYRKIYCGHHKLPAGLDADQKAALMRPLAEDSKPHHRRLSGGELNAFDLISFSSGLDLSGFFTEGIPDRERFVVVSAAERMVERVEQVGKGEGLVVRRVGEKGSVVVVEKQNGELVVRVEVHRLLGDTAVVELEKGGAAGSFWNEKLRPTWEATGDSPLASRTRNV…
HcSnRK3.41	MAESTQVKSGNGAQKRAKKEPKLLLGRFEVGKLLGAGTFAKVYVARNVRTDELVAIKVLEKDKIIKWGLVAQIKREIAILRRVRHPYVVQLFEVMATKTKIYFVMEYVRGGELFSRVSKGRLREDAARRYFQQLVSAVGFCHARGVFHRDLKPENLLVDENGDLKVSDFGLSAVAEQSRGGDGLLHTFCGTPAYVSPEVLSRRGYDGAKVDIWSCGVILFVLTAGCLPFRDCNIVSMYRKIYKGDFRCPRWFSPDLKRLLHRLLDTNPGTRITILEIMEDNWFKKGFRHVQFYTEDDQLHNLEDASQMCNDGALGDAASLWETESDCSVISCASSLSEEKRKRPRMSRPPTLNAFDIISFSRGFDLSGLFEETGDETRFLSQEPVSSIITKLEEISKAV…
HcSnRK2.6	MEERYEPMKELGVGNFGVARLVKDRRTGELVAVKYIERGKKIDEHVQREIINHRSLRHPNIVRFKEVVLTPTHLAIVMEYAAGGELFERICNAGRFSEDEARFFFQQLISGVSYCHSMEICHRDLKLENTLLDGSPTPRVKICDFGYSKSALLHSQPKSTVGTPAYIAPEVLSRKEYDGKIADVWSCGVTLYVMLVGSYPFEDPEDPRNFRKTISRIFSVQYSFPDYIRVSPGCRQLLSQIFVADPSKRITIPEIKKHPWFLKNLPKEIINGEKTNYETGNDQSSQSVEEIMHIIEEAKKPSECPTAHDRTLSELAEADELEAGIDAEVDSSGDYSSPI
HcSnRK3.4	MDHKQTILMRRYELGRLLGQGTFAKVYLAKNLQSGQIVAVKMIDKRTVMREGLVQQIKREISVMRLVRHPHIVQLFEVMASKSKIYFVMEYVKGGELFQKVAKGRLREDVARKYFQQLISAVDFCHSRGVYHRDLKPENLLLDDNENLKVSDFGLSALVDSKRQDGLLHTTCGTPAYVAPEVIRSMGYDGAKADIWSCGVILFVFLAGYLPFQFNDSNVMEMYKKIGKGELKYPSWFTLDLRKLISKILDPNPRTRISIAKIKENQWFKKGFVDRKLQSEKETIGDVPSDVAEVFGSFNGNMGEGKQETFPVKNMNAFHIISLASGFDLSSLFDKSEQKKEIWFTSRKPVSTIQDKLKDIAKALKLKFKNNNDGVFKLESLKEGRSITTIEAEILEAAP…
HcSnRK2.8	MEKYEVVSELGSGNFGVARLLRHKETKELVAMKYIPRGHKVVLTPTHLGIVMEYAAGGELFDRICNAGRFSEDEARYFFQQLICGVSYCHFLQICHRDLKLENTLLDDSPAPRLKICDFGYSKSSVLHSRPKSTVGTPAYIAPEVLSRGEYDGKTADVWSCGVTLFVMLVGAYPFEDPDDPKNFRKTIGRIVSAQYKIPSYVHLSEDCKQFLSRIFVANPAWRLTISEIRNHPWFLKNLPKELTEAAQAQYYQRENAALTYSLQSAGEIMRIVEEARASSSTALVSGFAEYDEGEGENDYVEDEEDDEYDKRVKEVRASGEYAVVD
HcSnRK2.9	MEERYESLKDLGAGNFGVARLVKDKRTGELVAVKYIERGKKIDEHVQREIINHRSLRHPNIVRFKEVVLTPTHLAIVMEYAAGGELFERICNAGRFSEDEARFFFQQLISGVSYCHSMEICHRDLKLENTLLDGSPTPRVKICDFGYSKSALLHSQPKSTVGTPAYIAPEVLSRKEYDGKIADVWSCGVTLYVMLVGSYPFEDPEDPRNFRKTISRILSVNYSIPDYIRVSPECRQLLSQIFVANPSKRITIPEIKKHPWFLKNLPNEIMNSEKTNYETENDQASQSVEEIMRIIEEAKKPSECPTASNHTLSELAETDELEADIDSEVDSSGDFLAPM
HcSnRK1.4	MVAHRDLKPENLLLDSKCNVKIADFGLSNVMRDGHFLKTSCGSPNYAAPEVISGKLYAGPEVDVWSCGVILYALLCGTLPFDDENIPNLFKKIKGGIYTLPSHLSALARDLIPKMLVVDPMKRITIPQIREHAWFKIRLPRYLAVPPPDTSQQAKKIDEDILLEVTKMGFDKNQLVESLHNRIQNEATVSYYLHVDNRFRATSGYLGGDFQETMDYLNTNPSDLAAPHRQPGYMEQQGMINPRAAPSLASERKWALGLQSRAPPREIMTEVLKALQELNISWKQIGHYNMKCRYFPGFADSPAAIETEGADKEPLAVKFEMQLYKTREDKYLLDLQRVSGPQLLFLDLCAAFLAQLRVL
HcSnRK1.2	MEGSGRGGGSADVVLQNYKLGKTLGIGSFGKVKIAEHLLTGHKVAIKILNRRKIKNMKMEEKVRREIKILRLFMHPHIIRLYEVIETPSDIYVVMEYVKSGELFDYIVEKGRLQEDEARHFFQQIISGVEYCHRNMVVHRDLKPENLLLDSKGNVKIADFGLSNVMRDGHFLKTSCGSPNYAAPEVISGKLYAGPEVDVWSCGVILYALLCGTLPFDDENIPNLFKKIKGGIYTLPSHLPALARDLIPRMLIVDPMKRITIREIREHAWFKTLLPRYLAVPPPDTLQQAKKIDEDILQEVTKMGFDKNQLVESLHNRIQNEATVSYYLLLDNRFRSASGYLGGDFQETMEYNLLHRSSSSIPAPHRLPGYMEQQVIGSRENFPAERKWALGLQSRAHPR…
HcSnRK3.23	MNTTKIKRRVGKYELGRTIGEGTFAKVKFARNIETGEPVAIKILDKEKVLKHKLVEQIKREVATMKLIKHPNVVRIYEVMGSKSKIFIILEFATGGELFDKIVNHGRMREDEARRYFQQLINAVDYCHSRGVYHRDLKPENLLLDAYGNLKVSDFGLSALSQQVRDDGLLHTTCGTPNYVAPEVLNDRGYDGATADLWSCGVILFVLLAGYLPFEDSNIITLYKKISSAEFTCPSWLSFGAMRLLAKILDPNPLTRVTISEILEDEWFKKGYKPPVFEENYSGNSDDVDAVFKDSEEHHVTEKKEEQPTSMNAFELISMSKGLDLGNLFDPEQEFKRETRFTSTSPAKEIIDKIEEAAKPLGFDVQKKNYKMRLENIKAGRKGNLKVATEVFQVAPSLH…
HcSnRK3.12	MEDCGGGGVLQGRYELGRVLGRGSFGKVHLARDLCAGRSVAVKVVDKATVVRAGMMDHLKREISAMRMVRHPNVVALHEVMATRSKIYLAMELVRGGELFARVARGGRLCESAARRYFRQLISAVDFCHRRGVYHRDLKLENLLLDENDDLKVADFGLSALTDPAKEDRLLQTLCGTPAYVAPEVLLQRGYDGAKTDVWACGVILFVLLAGFLPVPRRQHHGDVQKDLPRRFPVPAVDFSWRPSHHRQVARPKSQHQNHPHEAHGVFVVQQIRPAETRTKRGRTDYGASGGGAREVERFPLDIVLGGLQPISSVRRGEERRDEVHDEGAGEQRGVEAGERSGKHVGEVAGDEERRRRGVDGGREQGEDGEAGDRCAILCAGGICARGGGEEGRRRHGGV…
HcSnRK3.33	MASVGRTARVGKYELGRTLGEGTFAKVKFAKNVETGEGVAIKILDKEKILRHKMVGQIKREISTMKLIRHPNVIRMYEVMASKTKIYIVMEFVTGGEFFDKIARNGKLKEDEARKYFQQLINAVDYCHSRGVSHRDLKPENLLLDANGTLKITDFGLSALPEQVHEDGKLYTTCGTPNYVAPEVVKHKGYDGAKADLWSCGVILYILMAGFLPFEDSNLMSLYKKIFKADFSCPPWFSTSVKKLIQRILDPDPLTRITIQQVIENDWFKKDYKPPHFETADVNLDDVDAIFNESKELSNMVVERREEKPVIMNAFELISKSQGFNLSTLFDKQMGHVKRDIRFTSKLPADEILSKIESAAKPLGFSVKKQNYKIKLDGEKPGRKGHLAIAAEVFEVAPS…
HcSnRK3.32	MSNGGCGVGGGGMATRTRVGKYELGRTLGEGSFAKVKYARNVQTGDSVAIKILDKHHVLRHKMVEQIKREISTMKLIKHPNVVQIHEVIASKTKIYIVLELVDGGELFDKIANHGKLKEDEARRYFQQLINAVDYCHSRGVYHRDLKPENLILDSFGVLKVSDFGLSAFAPQIREDGLLHTTCGTPNYVAPEVLNDKGYDGTTSDVWSCGVILFVLMAGYLPFDEPNIMNLYKKISKADYSFPAWFSSGAKKLVTRILDPNSLTRITIPEILADEWFKKGYKPPSFEHGEDVSLDDIDAVFNNSEEHLVTEKKEKPESMNAFELISRSQGFNLGNLFEKQMGLVKRETRFTSQHPPNEIISKLEEAAKPLGFKVRKHNYKMKLQGDKSGRKGHLSVATE…
HcSnRK3.37	MEHAGKIVMQRFELGRLLGQGNFAKVYYARNLKTGQGVAIKIFDKEKLMRVGLIERTKREISVMRLVRHPNVVHLFEVMASKRKVYFVMEHVKGGELFDKIAKGKLDEDVARRYFQQLVIAVDYCHSRGVYHRDLKPENLLLDENGNLKVSDFGLSAVADCKRQDGLLHTICGTPAYVAPEVINRFGYDGAKSDTWSCGVVLFVILAGYLPFHDSNLMELYRKIRKGEFRFPSWFSLEVRRLISKMLDPDPITRISIAKVMESRWFRKSFDDKKLKGIAAKEDAVMDVSAALSSSSNSSETKQDSSEIKNLNAFDIIALSPGFDISGLFQEGNHKKEFWFTSKSAALTIISKLKDLAKHLRLTITKKEDGILKMEQLYEGKKGVLSIDAEIFEMTPALH…
HcSnRK3.35	MEEEAAPETSLAEKRRKKDIGGGGLLLGRFDVGRLLGAGSFAKVYVARDVRTDELVAIKALDKEKIVKGGFAAHIEREIAILRRVRHPYIVQLFEVMATKTKIYFVMEYVRGGELFGRVAKGRLLEDTARRYFQQLISAVSFCHARGVFHRDLKPENLLLDDNGDLKVSDFGLSAVAEQMHVDGLLHTFCGTPAYVAPEVLARRGYDGAKVDVWSCGVILFVLMAGYLPFHDRSIVAMYRKIYKGSFRCPRWFSQDLTHLLHRLLDVNPQSRATIPEIMENPWFRKGFRHIRFYIEDNQMHSFNDSDSEDEQLKSNEPKPDETYESGSESDSSVASCPASFYDESYQHHPSLRPPSLTAFDIISFSSGFDLSGLFDEKGEMTRFLSKEPVPVIVSKLED…
HcSnRK3.8	MAASTPAKLGNQSKRPAKKEPKLLLGRFEVGKLLGAGTFAKVYVARNVRTDDLVAIKALSKEKIVKWGLVTHIKREIAILRRVRHPYVVQLFEVMATKTKIYFVMEYVRGGELFSRVSKGRLREDTARRYFQQLVSAVAFCHTRGVFHRDLKPENLLVDENGDLKVSDFGLSAVAEQSRGGDGLLHTFCGTPAYVAPEVLSRRGYDGAKVDIWSCGVILFVLMAGSLPFHDRNIVSMYRKIYKGEFRCPRWFSPDLNRLLHRLLDTNPRTRITIPEIMEDNWFKKGFRHVQFYTEDDQLHTLADDPQMGADEAQGDAGSLWETESDCSLISCASSVSEDKRSRPGMSRPPSLNAFDIISFSRGFDLSGLFEETGDETRFLSKEPVSTIITKLEEIAKVV…
HcSnRK3.28	MRKRVGKYELGRTLGEGSFAKVKYARNVQTGNSVAIKILDKHHVFRHNMVEQIKREISTMKLIKHPNVVQISEVIASKTKIYIVLEFVDGGELFDKIVNHGRLKQDEVRRYFHQLIDAVDYCHSRGVYHRDLKPENLLLDSFGVLKVSDFGLSAFAPQIREDGLLHTACGTPNYLAPEILNDKGYDGTTSDVWSCGVILFVLMAGYLPFDEQNITILYKKISKADYSFPAWFSSGAKKLIARILDPNPSTRITIPEILSDEWFKKGYKPPSFEHGEVVSLDDIDAVFNNSEVVTKHKGKRRRKPESMNAFELISRSQGFNLGNLFEKQMGLVKRETRFTSQCPPNEIISKLEEAAKPLGFNVRKHNYKMKLQGDKSGRKGHLSVATEVFEVAPSLHMVE…
HcSnRK3.36	MTVVENKGSVLMKKYEIGRFLGKGTFAKVYYARDVKTSQSVAIKVIDKEKVFKVGLNDQIMREISVMRMVRHSNVLELYEVMATRSKIYFVLEYAKGGELFNKVVKGKLREDVARKYFQQLISAIDFSHSRGVYHRDLKPENLLLDENGNLKISDFGLSALAESKRQDGLLHTTCGTPAYVAPEVISRKGYDGAKADVWSCGVILFVLLAGHLPFNDSNLIEMYRKIGKSEYRCPNWFPLEVRRLLLRILDPNPATRISTAKIMENPWFRKALDGGVTRKGKGTPELDQPNIDDDLNSLGTKMTTERQEMGKLSNLNAFDIISLSDGFDLSGLFEEPDHKSEARFISAQPASSIILKLEDVAKYMKFKIKKKDHGVLKMEGSESGKKGVLVIDAEIFEV…
HcSnRK3.24	MKEGEESERRSRPGMRSLLSKYEVGRTLGEGNFGKVKYARHVETGRSFAVKILDRKRIQSLNLDDQIKREIGTLKLLKHPNIVRLYEVSASKIKIYMVLEYVNGGELFDIIPAKGQLSEKQGRHFFQQLIDAISYCHDMGVYHRDLKPENVLVDANGNIKISDFGLSALPQHLGNDGLLHTTCGSPNYIAPEVLTNRGYDGARSDIWSCGVILYVLLTGYLPFDDRNLAVLYQKILRGDTKIPKWISPGAQNILRRILDPNPITRINVAGIKADEWFKEDYVPAVPNDGCGDEEIIFHNSLPSKEHNVADENETSPSHINAFQLIGMSSSLDLSGFFEKEDVSERKIRFTSNYSPSVLFDRIVDIVTQMDLQVQKTHDKLKVVQKQDSKTPKNTGSLCV…
HcSnRK2.1	MDRAALTVGPGMDLPIMHDSDRYELVKDIGSGNFGIARLMRDKQTKELVAVKYIERGEKIDENVKREIINHRLLRHPNIIRFREVILTPTHLAIVMEYASGGELFERICDAGRFSEDEARFFFQQLISGVSYCHSMQVCHRDLKLENTLLDGSHAPRLKICDFGYSKSSVLHSQPKSTVGTPAYIAPEVLLKKEYDGKIADVWSCGVTLYVMLVGAYPFEDPDEPKNFRKTIQRILSVQYSIPDYIHISMECQHLISRIFVANPATRITIPEICNHEWFLKNLPSDLMDENTMSSQYEEPEQPMQSSDAIMQILAEATIPAAGTSGLNQHLIGSLDLDDDDMEDFDSDLDLDVESSGEMIYAM
HcSnRK3.25	MKLIKHPNVVRIYEVMGSKTKIFIVLEFITGGELLDKIINHGRMRESEARKYFQQLINAVDYCHSRGVYHRDLKPENLLLDAYGNLKISDFGLSALSQQVRGDGLLHTACGTPNYVAPEVLNDRGYDGATADLWSCGVILFVLLAGYLPFEDSNLMTLYNKISAAEFTCPTWFSLEVKILLTRILDPNPMIRITVPEILKNEWFKKGYKPPVFEETYEANLDDVHAVFMDSEEHHVKEKEEQPTMMNAFELISMSKGLDLGNLFDVEQEFKRETRFTSTCPANEIVSKIEEAAKPLGFDVQKKNYKMKLENAKAGRKGNLKVATEVFQVAPSLHMVEVRKAKGDTLEFHKFYKNLSNSLKEVVWISEEAAQQQEQDA
HcSnRK3.9	MGSRQPSPSTAAAAKPRHHEVLLGKYELGRLLGRGTFAKVYLARSVSDGTDVAVKILDKAEMVETGMADSVLTEVAAMRRLSHPNILKLHEVLATRSKIFLVMEHAPGGDLLGRVARRRLPEHASRRYFHQLVSALHYCHARGVAHRDVKPQNLLLDRDGNLKVSDFGLAALPDRLRDGLLLTACGTPAYTAPEVFRRKGYDGAAADAWSCGVILFVLLAGSLPFDDANLAVMYRRIHRRDYELPPWISPPARRLLVRLLDPNPDTRMTIANLFDHPWLKRSLSLDSQLDNLSPPPLTAAHAMNAFDIISLSSGLDLSPFFDDAKAKKERRFTSTHTIDKIMDTIQLTGSKLGLVVETEKSAATAVEGLWLCALSGGVGGTIAASAGGDETAARLQSAT…
HcSnRK3.15	MAEAEAARLECHPAKRVKTGAKLLLGRYELGKLLGAGTFAKVYVARNEKTEEDVAIKVLDKEKIVKLGLVALIKREIAILRRVRHPYIVQLLEVMATSTFRGGELFTRVSKGRLKEDTARRYFQQLISAVAFCHARGVFHRDLKPENLLVDENGDLKVSDFGLSAVADQSRGGDGLLHTLCGTPAYVAPEVLSRRGYDGAKVDIWSCGIILFVLMAGYLPFQDANIVSMYRKIYKGDFRCPRWFSQDLYRFLRRLLDTNAQTRITIPEIMEDKWFKKGFRPVLDDYQLRCPEDPDLQDDGVQGDVTLDWETESDCSAVSCPATLVEEKRRRKGMRRPVSLNAFDVISFSRAFDLSGLFGETGDETRFLSKESVTTIISKLEEIAKVVSFTVRRNDSGAS…
HcSnRK3.14	MEKKGAVTVLMNRYELGRLLGQGTFAKVYQARNLATGAIVAIKVIDKEKVLRVGMIDQIKREISVMRLVHHPNIVELYEVMATRSKIYFAMEYVRGGELFSKVAKGRLKEDTARKYFHQLIAAVDFCHSRGVYHRDLKPENLLLDEKGDLKVSDFGLSALGASRGRDGLLHTTCGTPAYVAPEIISKKGYDGAKADIWSCGVILFVLLAGYLPFHDSNLMEMYRKISRGDFRCPYWFPSDVKKLLLRLLEPNPAVRITVAKLIENPWFRKGYYKDINQHQAQMKRDESLGDVRRAFADEEGQESEDDSKRQSFSGGPSRTTSPVRPERLNAFDLIARSPSFDLSGLFEEDSNHGPRASGARFTTQKTTEAIVSKLEEIARTERFRVRKEKEGVVKLEGS…
HcSnRK3.11	MESVGRMRVGKYELGRTLGEGTIAKVKFAKDVETGESVAIKIFDKDKILRHKMVGQITREISTMKLIRHPNVIRIYEVIASKTKIYLVLEFVDGGELFDKIASRGKLKEEEARKYFQQLINAVDYCHSRGVFHRDLKPENLLLDTNGVLKISDFELSALPQQVRENGFLYTACGTPNYVAPEVVKDKGYDGAKADIWSCGVILFILMAGYLPFEGSNLMSLYKKIFKADFSCPNWFSTSAKKLIKRILDPNPQSRNTISQIIENEWFKKGYQPPQFETAEVSLDDVDAIFNKSGEATNLVFERREERPVVMNAFDLISTSQGLDLGILFERQLGLVKRETRFTSKLPANEILFKIEEACKPMGFDVKKQNYKLKLQGEKSGRKGHLAIATEVFEVAPLL…
HcSnRK3.19	MKRDAEVVRVGKYEIGRTLGEGNFAKVKLARHVDSGRCFAVKILERKRVLDLRTHDQIKREIATLKLLRHPNVVRLFEVLASKTKIYMVLEYETGGELFDRIESKGRLPEPEGRKLFQQLIDAVSYCHEKGVFHRDLKPENVLLDTQGNIKISDFGLSALPQQFGHDGLLHTTCGSPNYVAPEVIANKGYDGATADIWSCGVILYVILTGCLPFDDTNLVVLYQKISKGDVQIPKWLSSGARNMIRRILDPNPQTRINMTQIKEDKWFKQDYTPVEPEEDDEEDIDSDVESFSIREVPEADKHGDSCHHINAFELIGMSSCLDLSGFFEEEDASSRKIRFTSNCQPEELLNKIEDIVTSMGLQVQRGHGKLKVIQNCEIKTSVKSLSAVTEVFELGPSL…
HcSnRK3.22	MEEVPSPAPSAEGQSVLHRRYELGRVIGQGTFAKVHLARNLLTGKCVAIKVVGKEKVIQAGMMEQVKREISVMKMVRHPNIVELHEVMATRSKIYFAMELVRGGELFAKVARSGRLRDDAARHYFRQLVSAVDFCHSRGVYHRDLKLENLLLDEQGNLKIADFGLSAFAEHVRPDGLFHTTCGTPAYVAPEVVGKKGYDGAKADIWSCGVILFVLLAGFLPFQDENILAMYKKIRRGDFQCPPWFSSDARRLITKLLDPNPKTRITFERLMEAPWLKKYTITRSLSAPPAPTTASESEETGDKEREKKDGEEPELLNAFHLISFSEGFDLSPLFSGGERREENVLRFATREPASGVVSRLEGVVARAAAKYKVTKSCPAGVRLEGKQRGRNGKLAVTAD…
HcSnRK3.13	MELENKGNVLMCKYEVGRMLGKGTFAKVYYARDLKTSQSVAIKVIDKEKVFKVGLNDQIKREISVMRLVKHPNIVELYEVMATKSKIYFVLEYVKAGELFNKVAKGKLKEDVARKYFQQLISAVDFCHGRGVYHRDLKPENLLLDENDNLKISDFGLSALAESRRQDGLLHTTCGTPAYVAPEVISRKGYDGAKADIWSCGVILFVLMAGYLPFHDPNLIELYRKIAKADFKCPNWFPLEVRRLLARILDPNPITRITIPKIMENPWFRKGNNGGSNGNDKEMQETDRDKINEVSDSQSINMIEERPEVGKLTNLNAFDLISLSDGFDLSGMFEETDHKKEARFISHHSASTIIAKLEDIAKFLKLKVKKKDNGTLKMEGTRVGKKGVLAIDAEIFEVT…
HcSnRK3.3	MEELPPETASPEGKRPLHGRYELGPVLGYGTFAKVYLARDVRSGKGVAVKVVAKDKVLRAGMEEQLKREIAVMRAVRHPNIVELHEVMASRSRIFFAMELVRGGELFALIARHGRLHDDAARRYFGQLISAVDFCHSRGVYHRDLKLENLLLDEAGDLKVADFGLSAFASADDGLLHTACGTPAYVAPEVIRKKGYDGAKADLWSCGIILFVMLAGYLPFQDDNLITMYQKIHRADFRCPPWFSAETRRVVTKLLDPNPGTRLTVARLAEMPWFKKTRILRTPVVGSSSKGENKHDEPVAAEEEQKTLNAFHLISLSEGFDLSPLFEQGRGRRSEGMRFATRETAEGVVAKLEDVAGGRFLVTRIGLAGVRMEKKEIGRKGKLAVAAKILTVAPTVRLV…
HcSnRK3.2	MGKESETRNLVLGKYEMGRVLGKGTFAKVYLGRDLRTRESVAIKVIHKDRIRREAGMAEQIEREISVMRLVRHHHVVELREVMATRSRIFFVMEYVRGGELFARVARGALPEDQARRYFRQLISAVDFCHRRGVSHRDLKPENLLLDHDGNLKVSDFGLSALPEQRRHDGLLHTQCGTPTYVAPEVLRRRGYDGAKADLWSCGVILYVLLAGFLPFREENMMRMYCKVLKAEYQTPPWFSRDACRLISLLLVANPENRISIPAIMEHPWFKKGACSQNPPPLPTPPPQLPPPVDEDEQKAVSPKFYNAFEFISSLSSGFDLSSLFDNRRPAGTVFTSSSPAAAIVERLERAGRGLGFDVRRAKPYKVKMERKGGEGWRQPLEVTAEVFEAAVTVAVVEL…
HcSnRK3.27	MNTTKVKRVSKYELGRTIGEGTFAKVKFARNIETGEPVAIKILDKEKVLKHKLVEQIKREVATMKLIKHPNVVRIYEVMGSKSKIFIVLEFATGGELFDKIVNHGRMREDKARRYFQQLINAVDYCHSRGVYHRDLKPENLLLDVCGNLKVSDFGLSALSQQVRDDGLLHTACGTPNYVAPEVLNDRGYDGATADLWSCGVILFVLLAGYLPFEDSNIMTLYKKISSAEFTCPSWLSFGAMRLLARILHPNPSTRVTIPEILEDEWFKKDYAPPVFEENYAANSDDVGAVFKDSEVSQRQLPPTFLEHHVTEKKEEQPTPMNAFELISMSKGLDLGNLFNQEQEFKRETRFTSTCSAKEIITKIEEVAKPLGFGIQKKNYKMRLENIKAGRKGNLKVAT…
HcSnRK1.3	MEGSGRGSSVDVVLQNYKLGKTLGIGSFGKVKIAEHLLTGHKVAIKILNRHKVKSLEMEEKVRREIKILRLFMHPHIIRLYEVIETHSDIYVVMEYVKSGELYDYITQKGRLQEDEARHFFQQIISGVEYCHRNMVVHRDLKPENLLLDSKCNVKIADFGLSNVMRDGHFLKTSCGSPNYAAPEVITGKFYAGPEVDVWSCGVILYALLCSALPFDDDNIPNLFKKIKGGLYTLPSHLSALARDLISKMLVVDPMKRITIGQIREHAWFKIRLPRYLTVPPPDTSQQAKKIDEDILLEVTKMGFDKDQLIESLHNRIQNEDYLHTSSSDIAVPNRLPGFPATERKWALGLQSRAHPRKIMTEVLKTLRDLNVSWKKNGHYNIKCRYRRADGVSIVETES…
HcSnRK2.11	MDLPIMHDSDRYELVKDIGSGNFGIARLLRDKQTKELVAVKYIERGEKIDENVKREIINHRLLRHPNIIRFKEVILTPTHLAIVMEYASGGELFERICNAGRFSEDEARFFFQQLISGVSYCHSMQVCHRDLKLENTLLDGSVAPRLKICDFGYSKSSVLHSQPKSTVGTPAYIAPEVLLKKEYDGKIADVWSCGVTLYVMLVGAYPFEDPEEPKNFRKTIERILSVQYSIPDSIPISPECQHLISSIFVANPAMRITIPDIRNHGWFLKNLPADLMDDTTMSNQYEEPDQPMQSSDEIMQILAEATIPAVSTSGLNQHLFGSLDLDDDDMESFDSDPDLDIESSGEMIYAM

## Sheet: cds
evm.model.scaf_132.10	ATGGCAGGTGAAAATAGAAGTAGCGGAAGCGGCGGCGGTGGCGGCAGCAACGGAGGAAGCCGTGGCGGCGGCGGAAGGGGGCGGGCGCTGCTGCTGGGGCGGTACGAGGTGGGGCGGCTGCTGGGCCACGGCACGTTCGCGAAGGTGTACCACGCGCGGCACGCGGAAACGGGCGAGAACGTGGCGATCAAGGTGCTCGACAAGGAGAGGATCCTGCAGAGCGGGCTGGCGGCGCACACCAAGCGGGAGATCGCCATCCTGCGCCGCGTGCGCCACCCCAACATCGTCCACCTCCACGAGGTGATGGCCACCAAGTCGAAGATATACTTCGTCATGGAGCTGGTCCGCGGCGGCGAGCTCTTCGCCCGGGTCTCCAAGGGCCGCCTGCCGGAGCCCGCC…
evm.model.scaf_253.154	ATGGGATCGGTGGGACGGACGAGGGTGGGGAAATACGAGCTCGGGAGGACGCTGGGCGAGGGAAACTTCGCGAAGGTCAAGTTCGCCAAGGACGTGGAGACCGGTGAGAGCGTGGCCATCAAGATCTTCGATAAAGATAAGATCTTGCGACATAAGATGGTCGGCCAGATAAAACGAGAAATCTCGACTATGAAACTGATTAGACATCCGAATGTTATACGAATGCATGAGGTCATAGCCAGCAAGACGAAGATATACTTGGTTTTAGAATTCGTAGATGGTGGCGAACTCTTTGACAAAATTGCTCGGAACGGAAAATTAAAGGAAGACGAAGCTAGAAAGTACTTTCAACAATTGATCAATGCTGTGGATTACTGTCATAGTCGAGGCGTCTTCCAC…
evm.model.scaf_407.47	ATGGAGAAGTATGAGGTCGTGCGAGACATCGGATTCGGGAACTTCGGGGTCGCGAAGCTGATGCGCCACAAGGAGACCAAGGAGCTCGTCGCCATGAAGTACATCGAGCGCGGTCGCCGGATTGATGAGAATGTGGCGAGGGAGATCATCAACCATCGCTCCCTTCGGCATCCTAACATCATCCGCTTCAAGGAGGTTGTACTGACGCCGACGCATCTTGCGATCGTAATGGAGTATGCCAAGGGCGGGGAGCTCTTCGATCGGATCTGCGACGCCGGAAGATTTAGCGAAGACGAGGCGAGATATTTCTTCCAGCAACTCATTTCCGGGGTCAGCTACTGCCACTTTCGGCAAATTTGCCACCGTGATCTGAAGCTGGAGAACACCTTACTCGACGGC…
evm.model.scaf_191.34	ATGGAGAAGTACGAACTGGTGCGGGATCTGGGTTCCGGGAACTTTGGGGTGGCGAGATTGCTGCGGAACAAGGAGACGAAGGAGCTAGTGGCTATCAAGTACATCCCCAGAGGGCTCAAGATCGATGAGAATGTTGCAAGAGAAATCATCAACCACCGCTCGCTTCGCCATCCTAATATTATCCGATTCAAAGAGGTTATCTTAACGCCTACGCATCTTGGCATCGCCATGGAGTACGCTGCAGGAGGCGAGTTGTTCGAGCGGATCTGCAGCGCTGGAAGGTTCAGCGAAGATGAGGCCAGATACTTCTTCCAGCAGCTCATATGCGGCGTCAGCTACTGCCATTTCCTGCAAATATGCCACCGAGATCTGAAGCTAGAAAATACACTCTTAGACGGT…
evm.model.scaf_57.125	ATGGATCGGGCGGCGATGGCGGTCGGTCCGGCCATGGATCTTCCGATAATGCACGATAGCGACAGGTACGAGCTGGTGAAGGACATCGGATCGGGAAACTTTGGGATTGCCAAACTGATGAGGGATAAGCAGACCAAAGAGCTCGTCGCCGTCAAGTACATCGAGAGGGGAGAGAAAATAGATGAAAATGTAAAAAGAGAGATAATAAACCATAGATCACTAAGGCATCCAAATATTATAAGGTTCAAGGAGGTTATTTTAACTCCAACCCATCTCGCCATTGTAATGGAGTATGCCTCTGGTGGCGAACTTTTTGAACGTATTTGCAATGCTGGACGTTTTAGCGAGGATGAGGCAAGGTTCTTCTTCCAGCAACTTATATCGGGAGTTAGCTACTGC…
evm.model.scaf_39.21	ATGGCCACGCATCGTGCTGCGCTCACGGTTGGTCCGGCGATGGATCTGCCGATAATGCACGACAGGAACCGGTACGAGCTGGTGAGGGACATCGGGTCGGGGAACTTCGGGATCGCCAGGTTGATGAGGGACAAGCAGACCAAGGAGCTCGTCGCGGTCAAGTACATCGAGAGAGGCGAGAAGATAGATGAAAATGTTAAAAGAGAGATAATTAACCATCGGCTGTTGAGGCATCCTAATATAATCAGATTTAAAGAGGTTATTCTAACTCCGACCCATTTGGCGATTGTTATGGAATATGCTTCTGGCGGTGAGCTTTTTGAACGAATTTGCAATGCAGGACGCTTCAGTGAGGATGAGGCGCGATTTTTTTTCCAGCAACTTATATCTGGAGTTAGC…
evm.model.scaf_54.19	ATGAAGTACATCGAAAGGGGCCAGCGGATTGACGAGAACGTGGCGAGGGAGATCATGAACCACCGCTCGCTTCGTCATCCCAACATCATCCGCTTCAAGGAGGTCGTGCTGACGCCGACGCATCTGGCGATTGTGATGGAGTATGCGGCCGGCGGCGAGCTATTTGAGCGAATCTGCGACGCCGGAAGGTTCAGCGAGGACGAGGCGCGGTATTTCTTCCAGCAGCTCATCTCCGGCGTCTGTTACTGTCACGACCGGCAAATCTGCCATCGCGACTTGAAGCTGGAGAACACTCTGCTCGATGGGAGCCCTGCTCCGCGCCTCAAGATCTGCGATTTCGGCTATTCCAAGTCGTCCCTGCTGCACTCGAGGCCCAAGTCGACGGTGGGAACGCCGGCG…
evm.model.scaf_444.50	ATGTTGTGGAGCTCCGAGAGGTCATGGCAACCACGTCCCGCATCTTCTTCGTCATGGAGTACGTTCGCGGGCGGCGAGCTCTTCGCGAGCGTCCTCCGTGGACCGCTCCCGGAGGACAAGGCCCGCCGCTGCTTCCGCCAGCTCATATGCGCCGTCGAGTTCTGCCACAGCCTCGGCGTCTCCCACCGCGACCTCAAGCTGGAGAACCTCCTCCTCGATAACAATGGCGACCTCAAGGTCGCAGACTTCGGCCTCTCCGCACTCCCCGAACAGCGCCGCCACGACGGGCTTCTCCACACACAGTGCGGCACCCCGATGTACGTGGCTCCGGAGGTTCTCCGCAGCCATGGGTACGAAGGCTCCAAGGCCGACGTCTGGTCGTGCGGCGTCATCCTCTAT…
evm.model.scaf_971.16	ATGGACATGGTGAAGGATGGAGGAGGAGGAGGTGAGGGAATGCGAGTGCTGGGGAAGTACGAGCTGGGGAAGATGCTCGGAGAGGGAAACTTCGGCAAGGTCAGGTACGCTCTCGACGTCGACTTCGGCCGTCCCTACGCTATCAAGATACTCGACCGCCGCCGCATTCAATCCCTCAAAATCGCGGACCAAATTAAGAGGGAGATCGCCACCTTGAAGCTCTTGAAGCATCCCAATGTCGTCAGATTATATGAGGTCTCAGCAAGCAAAACCAAGATTTACATGGTCCTTGAATATGTTAATGGAGGCGAGTTATTCGACAGAATTGTAAGCTCTCAGAACGTGAAGGAAGGAAGCTTTTTCCAGCAGCTGATTGATGCCGTAAGTTACTGCCATGAT…
evm.model.scaf_430.44	ATGGCAGAGGCAGCGGCGCCGGAGATGAGCTTGACTGAGAAGAGGAGGAATAAGGATACCGGAGGAGGCGGCCTCCTCCTTGGGCGGTTTGATGTGGGCAGGCTCCTCGGTGCCGGCTCCTTCGCCAAGGTCTACGTCGCTCGCGACGTGCGCACCGACGAGCTCGTGGCCATCAAGGCGCTCGACAAGGAGAAGATCGTCAAGGGAGGATTCGCCGCGCACATCAAGCGCGAGATCGCCATCCTCCGCCGCGTGCGCCACCCCTACATCGTGCAGCTCTTCGAAGTCATGGCTACCAAGACTAAGATCTATTTCGTCATGGAATACGTCCGCGGCGGCGAGCTATTCGGCGGCGTCGCCAAGGGGCGGCTCCTCGAGGACACCGCCCGCCGCTACTTC…
evm.model.scaf_685.16	ATGGAGTTCAGAGGGAAAGTTGTGATGCAAAAGTATGACTTGGGAAGACTATTAGGGAAAGGAACTTTCGCAAAGGTGTACTATGCTAGGAATATCAGTGATGGCCAAAGTGTTGCTATAAAAATCATTGACAAAGAAAAAGTAGTGAAGGCTGGTCTCATGGAACAGGTGAAACGCGAAGTGTCGGTGATGAGATTAATCAGGCATCCAAATATAGTGTATCTCTTTGAGGTCATGGCCAGCAAAACCAAGATTTACTTTGTCATGGAGTATGCCAAAGGTGGTGATCTGTTTAGCAAGGTTGCAAAAGGAAAAGTAGATGTTGGTGATGCTCGAAAGTACTTTCGGCAGTTGATTAGTGCCGTCGACTACTGCCACAGCAGAGGTATCTATCACCGT…
evm.model.scaf_304.12	ATGCCTGCCACTCGACGACACCGCAACGAAAAGAAGTTGCCCAAATTAGAAGTTAGAACCAGGTCTCCTTCTTCTCTCATGGCAGACGAAAGTAGCAGCAGGAGCGATGGCGGGAACGGGGGGAGTCAGCGTGGCGGCGGCGGCCGGGGGTTGCTGCTAGGGCGATACGAGGTGGGGCGGCTGCTGGGCCACGGCACGTTCGCCAAGGTGTACCACGCGCGGCACGCGGGGACGGGGGAGAGCGTGGCCATCAAGGTGCTCGACAAGGAGAAGATCCTGCAGAGCGGGCTGGCGGCGCACACCAAGCGCGAGATAGCCGTGCTCCGGCGCGTGCGCCACCCCAACATCGTGCACCTCCACGAGGTGATGGCCACCAAGTCCAAGATCTACTTCGTCATG…
evm.model.scaf_33.46	ATGGAAAGAGGAAATAAAGGGAATGTGTTAATGAAGAAATATGAAGTGGGGAGATTACTAGGGAAAGGAACATTTGCCAAGGTCTACTATGCTAGGGATATTAAGACTTCTCAATGCGTTGCCATTAAGGTAATTGACAAGGAGAAGGCTTTGAAAGTTGGGCTTATTGATCAAATTAAGCGGGAGATATCAGTGATGAGATTGGTGCGGCATTCAAATGTCTTGGAGCTTTATGAGGTCATGGCCACCAGATCTAAGATATACATCGTCCTGGAATATGCCAAAGGTGGTGAATTGTTTAGAAAAGTTGCCAAAGGTAAGCTCAAAGAAGATGCTGCTCGAAGATATTTTCAGCAACTGCTTACCGCTGTAGATTTCTGTCATAGCAGAGGCGTCTGT…
evm.model.scaf_79.41	ATGGAGGAGGTGGTGGCTGCATCGCCGGCGACTTCCGTTGAAGGCCGCAGCGTGCTCCAAGGGCGGTACGAGATTGGGCGGGTCATCGGACAGGGCACGTTCGCGAAGGTGCATCTTGCGAGGAATATTCTTACAGGTGAGGGCGTGGCCATCAAGGTGGTGGGCAAGGAGAAGGTGATCCAGGTGGGGATGATGGAGCAGGTGAAGCGCGAGATCTCGGTAATGAAGATGGTTCGCCACCCTAACATTGTGGAGCTTCACGAGGTGATGGCGACGCGGTCAAAGATCTACTTCGCCATGGAGCTGGTCCGCGGTGGGGAGCTGTTCACCAAGGTGACCCGATCCGGTCGCCTCCGCGAGGACGCTGCCCGGCGTTACTTCCGCCAGCTCGTCTCCGCC…
evm.model.scaf_219.55	ATGGCTGAATCCATCGTCGGCGAAGAGGCTCCGTCGAAGGTCATCTTCGGAAATTACGAACTGGGCTGCCTCCTCGGCCGCGGCTCCTCCGCCAAGGTCTACCACGCGCGCCACCTCCCATCCGGCAATTCCGTCGCCATCAAAGTCTTCCCCAACCCCCGCCGCCCCGCCGGGCATCCCGCCTCGGCTTCTGACTCCTTCATACGCGAGATATCTGCCCTCCGACGCCTCCGTCACCGCCACATCGTCCGCCTCCACGAGGTTCTCGCCTCCCGCTCCAAGGTGTACCTCGTCCTCGACCACGCCAAGGGCGGCGAGCTCTTATCCCGCATCGATGACCACGGCCGCCTGTCCGAGGACCTCGCCCGCCGGCTCTTCCACCAGCTGATCTCCGCCGTC…
evm.model.scaf_48.119	ATGCGATTAGGCTATTGCCATGATATGGGTGTTTACCACAGAGATCTAAAGCCGGAAAATGTACTTGTAGATGCACAGAGAAACATAAAGATATCTGATTTCGGCCTCAGTGCTTTACCTCAGCATTTAGGGAATGACGGCTTGCTGCATACAACATGTGGAAGCCCATATTACATTGCTCCTGAGGTTCTCTCCAACCGAGGTTACGATGGTGCAAGAACAGACATATGGTCGTGTGGTGTCATTTTGTATGAACTTCTCACAGGTGGTCTTCCTTTTGATGATAGAAATCTTGCTGTTCTATATCACAAGATATCTAGAGGAGACACCAAGATTCCCAAGTGGCTCTCTCCTGGTGCTCAAAACATACTAAGAAGAATACTCGATCCAAATCCTATA…
evm.model.scaf_769.7	ATGGTGGTGCGGCGGGTTGGGAAGTACGAGGTGGGGCGGACGATCGGCGAGGGTAACTTCGCCAAGGTCAAGTTCGCGCAGAACACCGAGACCGGTGAGAGCGTCGCCATGAAGGTGCTCGATCGCGCAACCATCATCAAGCACAACATGGTGGATCAGATTAAGAGGGAAATTTCCATTATGAAGCTGGTTAGACATCCCCATGTTGTTCGCCTTCACGAGGTGCTGGCAAGCCGGACCAAGATATATATAATCCTCGAATATATTACCGGTGGCGAATTGTTTGACAAGATTATTCGTCATGGAAAACTTAGTGAAGCTGAATCACGGAGGTATTTCCAGCAACTCATTGATGGGGTGGGCTACTGCCATAGTAAAGGGGTTTACCATCGAGATTTG…
evm.model.scaf_316.81	ATGATGGTCGGTAAGTACGAGCTTAAGCGCACCATCGGTGAGGGGATGTTCGCGAAGGTGAAGCTCGGGGTGGAGGTGGAGAGCAACGCCACCGTCGCCGTTAAAGTCATCGACAAGAAGACGGTGATCGAGAACAACTTAATGTATCAGGTGAAGAGGGAGATCAGCACGATGAAACTCCTCGATCATCCGAACATCGTCAAGATTCATGAAGTAATTGCAACAAAGACGAAGATATACCTTGTAATGGAGTATGTAGCAGGAGGGCAACTCTCTGATAAGCTGGCTTATCTCAAGAAAATAGATGCCAAGGAAGCCAGAAAATACTTCCATCAGTTAATTGATGCTGTGGATTACTGCCACAGCAGAGGAGTCTATCACAGAGACCTCAAGCCAGAG…
evm.model.scaf_414.48	ATGGACAACCAACAACCCACCGTTGACTGCGCCGCCGCCGCTGCCGCCGCCAAGCGCCGCCACCAAGAAGTCCTTCTTGGTAAGTACGAGCTCGGATGCCTCCTCGGCCGCGGCACCTTCGCCAAGGTCTACCTCGCTCGGTCCGTCTCCGACGGCGCGGCGGTGGCGGTCAAGATCCTCGATAAGGCGGAGATGGTGGCGACGGGCATGGCCCACAGCGTGCTCACGGAGGTGGCCGCCATGCGCCGCCTCTCCCACCCCAACATCCTCAAGATTCACGAGGTGCTGGCGACGCGGTCGAAGATTTTCCTGGTGATGGAACACGCGCCCGGCGGCGACCTGCTCTCGCGAATCGCCCGCCGCCGTCTCCCCGAGCACGCCGCCCGGCGCTACTTCCAC…
evm.model.scaf_275.28	ATGGAAAAGTACGAGGTGCTGAGAGACATTGGCTCGGGTAATTTTGGCGTCGCCAAGCTGGTTAGGGATGTGCGGACCAAGGAGCTCTTCGCCGTCAAGCTCATCGAGAGAGGGCAAAAGATTGATGAGCATGTTCAGAGGGAAATCATGAACCACAGATCATTGAAGCATCCGAATATAGTTAGATTTAAGGAGGTCTTGTTAACCCCAACACATCTAGCCATAGTCATGGAATATGCTGCTGGGGGAGAGCTTTTTGAGAGGATATGCAATGCTGGAAGATTTAGCGAAGACGAGGCAAGATTCTTCTTTCAGCAATTAATATCAGGGGTCAGCTATTGTCACTGCATGCAAATTTGCCATAGAGATCTCAAGCTAGAAAACACTCTTTTGGATGGT…
evm.model.scaf_259.98	ATGGTGAAGGAAGGAGGAGGAGGTGAAGGAATGAGAGTGCTGGGGAAGTACGAGTTGGGGAGGACGCTCGGCGAGGGAAACTTCGGCAAGGTCAAGTACGCTCTCCACGTCGACTCCGGCCATCCCTACGCCATCAAGATACTCGACCGCCGTCGAATTCAATCCCTCAAAATTACCGACCAAATTAAGAGGGAGATCGCCACCTTGAAGCTCTTGAAGCATCCCCACGTCGTCCGGTTATATGAGGTCTCAGCGAGCAAAACTAAGATTTACATGGTCCTTGAATATGTTAATGGGGGCGAGTTGTTTGACAAAATTGCGTTGAAGGGAAGGCTCTCAGAAGGTGAAGGGAGGAAGCTCTTCCAGCAGCTGATTGATGCTGTAAGTTACTGCCACGAT…
evm.model.scaf_259.23	ATGGGGTTAAAGAAGGTTGGCAAATATGATGTCGGCGAAACAATTGGACAGGGGACCTTCGCCAAGGTTAAGGTTGCTGTCAATACAGAGACCCGTGGGACCGTTGCCATCAAAGTCCTTGCAAAGAATACCATCCTCGAGCATAAGATGGTTCATCAGATAAAGAAAGAAATATCCATAATGAAGATTGTGAGGCACCCAAACATAGTAAAACTACATGAGGTTTTAGCCAGCTCAACAAAGATATACATCATCCTGGAACTAGCCGCTGGTGGTGAATTATTTGATAAGATTGTACACCAACGAAGACTTAGTGAGAATGAGTCTAGACGGTACTTTCAGCAGCTTATTGATGCAGTAGACTACTGCCATAGCAAGGGTGTGTACCATAGGGATTTG…
evm.model.scaf_163.43	ATGGAGAAGTATGAGCTTGTGAAGGATCTCGGCTCCGGCAACTTTGGCGTCGCCCGGTTGATGAGGAACAAGGATACCAACGAGTTCGTCGCAATGAAGTACATCCCCAGAGGCCAAAAGATCAATGAGAACGTCGCGAGGGAGATCAACAATCACAGGTCTCTGTGTCACCCCAACATCATTCGGTTCAAAGAGGTGCTGCTGACGCCGACGCACCTTGCGATCGTGATGGAGTACGCCGCCGGCGGAGAGCTCTTCGAGCGCATCTGCCTCGCGGGAAGATTCAGCGAGGACGAGGCGAGATTTTTCTTCCAGCAGCTTATCTGCGGCGTCAGTTACTGCCATGTCATGCAAATTTGCCACCGGGATCTCAAACTGGAGAACACCTTGCTCGACGGC…
evm.model.scaf_782.12	ATGGAGAAATACGAGCTCCTAAAGGACATTGGGTATGGGAACTTTGGAGTCACCAAGTTGATGAGGAACAAGGAGACGAAGGAGCTCGTCGCCGCCAAGTACCTACCCAGAGGGGAAACGATCGATGATAAAGTTGTGAGGGAGATTGTTAATCATCGTTCGCTTCGTCATCCTAATATTATCCAATTCATGGAGGTCATGCTCACGCCTACACATTTGGTGATCGTGATGGAATACGCCGCCGGGGGAGAGCTCTTTGAGCGGATCTGCAGCACGGGAAGGTTCAGCGAGGATGAGGCGAGGTACTTCTTTCAGCAGCTTATATGCGGTGTCAGCTACTGCCATCAACTGCAAGTTTGTCATCGAGATCTGAAGCTCGAGAACACTTTGCTTGATGGT…
evm.model.scaf_5.4	ATGGGGAAGGAGGCGGAGCAGGCGAGGAGTGAGGTGAGGAAGCTGGTGTTCGGGAAGTACGAGATGGGGAGGGTCCTGGGGAAAGGAACGTTTGCCAAGGTGTACTACGGCCGCGAACTCAGTTCGGGCGAGAGTGTCGCTATCAAGGTGATTGACAAGGAGCAGGTCCGGCGGCAGGCCGGAATGATGGAGCAGATCAAGCGGGAGATCGTGGTGATGCGCCTCGTCCGCCACCCCAACGTTGTGGAGCTCCGAGAGGTGATGGCCACAAAGACGCGCATCTTCTTCGTGATGGAGTACGTCCGCGGTGGCGAGCTGTTCGCCCGCGTCGCCCGCGGCCGGCTTCCGGAAGACCAAGCCCGCCGTTACTTCCACCAGTTGATCTCTGCTGTCGACTTT…
evm.model.scaf_32.21	ATGGGTAAAGAGGCGGAGCAGGCCAGAGGAGAGGTGAGGAGGTTGCTGTTCGGCAAGTACGAGATCGGGAGGGTCTTGGGGAAAGGGACGTTCGCCAGGGTGTACTACGGCCGCGAGCTCAGCTCCGGCGAAAGTGTAGCTGTCAAGGTGATCGACAAAGAGCAGGCCCGGCGACAGGCCGGAATGATGGAGCAGATCCGGAGGGAGATCAAGGTGATGCGCCTCGTCCGCCACCCCAACGTGGTGGACCTCCGGGAGGTGATGGCCACCAAGACGCGCATCTTCATCGCGATGGAGTATGTCCGCGGTGGCGAGCTCTTCGCCCACGTCGCCCGCGGCCGGCTGCCAGAGGACCAAGCCCGCCGCTACTTCCACCAGTTGATCTCGGCTGTCGACTTC…
evm.model.scaf_158.15	ATGGCGGAGCCGGCGGCATCGAAGGCGGCGACCGAGCAGGAGGCGATGGGCAAGAAAGGTGGCGGCGGAAGAAGCAAACGGCTCCTCCTTGGGCGGTTCGAAGTCGGGAAGCTCCTAGGTTCTGGAACCTTCGCCAAGGTCTATGTCGGCCGCAACGTGCGCACCGACGAGCTCGTCGCCATCAAGGCCCTGGACAAGGAGTCGATCCTCAAGGGAGGACTCGTCGCGCACATCAAGCGCGAGATCTCCATCCTCCGCCGCGTGCGCCACCCCTACATCGTCGAGCTCTTCGAGGTCATGGCTACTAAGACCAAGATTTACTTCATCATGGAGTTCGTCGGCGGCGGCGAGCTCTTCTCCATGGTCTCCAAGGGCCGCCTCCTCGAGGACACCGGCCGC…
evm.model.scaf_42.68	ATGCATCCTCATATTATCCGTCTTTATGAGGTGATTGAGACACCATCAGATATTTATGTTGTGATGGAATATGTTAAATCAGGAGAGCTATTTGATTATATTGTTGAAAAGGGAAGGCTACATGAGGATGAAGCTCGTCGCTTCTTCCAACAGATCATATCTGGTGTTGAATATTGCCATAGAAACATGGTTGTTCATCGGGACTTGAAACCAGAGAATTTATTGTTGGATTCAAAGTGTAATGTTAAAATTGCTGACTTTGGCTTAAGTAATGTCATGCGTGATGGTCATTTTCTGAAGACTAGCTGTGGAAGCCCAAATTATGCTGCTCCTGAGGTAATTTCGGGAAAACTTTATGCAGGGCCTGAGGTAGATGTGTGGAGTTGCGGTGTCATTCTT…
evm.model.scaf_15.312	ATGGCTGACCACGTCGCCGGTGCTCCGCCTCCGGCCAAAATCATTTTCGGCACCTACGAGCTGGGACGCCTCCTAGGCCGCGGCGCCTCCGCCAAGGTCTACCACGCCCGCCACCTCCCTTCCGGCCATTCTGTCGCTATCAAGGTCTTCCCTAAACCCCGACGCACAGCCGCCGCTTCCGCCTCCTCTGCTGACTCCTTCATAAGGGAGATCTCCGCTCTCCGCCGCCTTCGCCATCGCCACATCCTCCGCCTCCGCGAGGTCCTTGCCTCCCGCTCCACGGTCTACCTCGTCCTCGACTTCGCCAAGGGCGGTCAGCTCTTCTCCTGCGTCGAGGACCGCGGCCGCCTTCCGGAGGACCTCTCCCGCCGCCTCTTCCGCCAGCTGATCTCCGCCGTC…
evm.model.scaf_15.375	ATGGCAGAATCGACGCAGGTGAAGTCAGGGAACGGGGCGCAGAAGAGAGCGAAGAAGGAGCCGAAGCTACTGCTAGGCCGCTTCGAGGTGGGGAAGCTTCTCGGTGCCGGGACCTTCGCGAAGGTCTACGTCGCCCGCAACGTCCGTACCGACGAGCTCGTGGCCATCAAGGTGCTGGAAAAGGATAAGATCATCAAGTGGGGGCTCGTCGCCCAAATCAAGCGCGAGATCGCCATCCTCCGGCGCGTCCGACATCCCTACGTCGTTCAGCTCTTCGAGGTCATGGCCACCAAGACCAAGATCTACTTCGTAATGGAGTACGTCCGTGGTGGGGAGCTTTTCTCCCGCGTCTCCAAGGGCCGGCTCCGCGAGGACGCCGCCCGCCGATACTTCCAGCAG…
evm.model.scaf_843.18	ATGGAGGAGAGGTACGAGCCGATGAAGGAGCTGGGAGTCGGGAATTTCGGGGTGGCGAGGTTGGTGAAGGATAGAAGGACAGGGGAGCTCGTCGCCGTCAAGTATATTGAAAGAGGGAAGAAGATTGATGAGCATGTGCAGCGAGAAATAATTAACCACAGGTCATTGAGGCATCCAAATATTGTGCGGTTTAAGGAGGTGGTGCTAACTCCAACACACCTAGCTATAGTTATGGAATATGCTGCTGGTGGCGAACTATTTGAAAGGATATGCAATGCCGGTCGGTTTAGTGAAGATGAGGCAAGGTTCTTTTTTCAGCAGCTGATATCAGGAGTCAGTTATTGTCATTCTATGGAAATATGTCACCGTGATCTTAAGCTTGAGAATACACTCTTGGAT…
evm.model.scaf_108.24	ATGGATCACAAACAGACCATATTGATGCGGAGATATGAACTAGGGAGATTGTTAGGACAAGGAACATTTGCTAAGGTATACCTTGCTAAAAATCTTCAAAGTGGTCAAATTGTTGCTGTAAAGATGATTGACAAAAGGACAGTAATGCGAGAAGGTCTTGTTCAGCAAATCAAACGTGAGATATCCGTGATGAGATTGGTGAGACATCCACACATTGTTCAGCTTTTTGAGGTAATGGCCAGCAAGTCCAAAATTTACTTTGTTATGGAATATGTGAAAGGTGGCGAACTATTTCAGAAGGTGGCCAAAGGCAGGCTTCGAGAGGATGTTGCACGGAAATACTTTCAACAGCTAATAAGTGCAGTGGATTTCTGTCACAGCAGAGGTGTTTACCATCGT…
evm.model.scaf_326.23	ATGGAATACGCCGCCGGCGGTGAACTCTTCGACCGCATATGCAATGCCGGAAGATTCAGCGAAGATGAGGCACGATATTTTTTTCAGCAGCTCATCTGCGGCGTCAGCTACTGCCATTTCTTGCAAATTTGCCACCGGGACTTGAAGCTGGAGAACACTCTCCTGGACGACAGCCCCGCGCCGCGCCTCAAGATCTGCGACTTCGGTTACTCCAAGTCGTCTGTGCTTCATTCGCGGCCTAAATCCACGGTGGGTACGCCGGCCTACATTGCTCCCGAAGTGCTCTCCCGCGGGGAGTACGACGGCAAGACAGCTGATGTATGGTCCTGCGGGGTGACATTGTTTGTGATGCTGGTGGGAGCCTACCCCTTCGAAGATCCGGACGACCCCAAGAACTTT…
evm.model.scaf_326.60	ATGGAGGAGAGGTACGAGTCGCTGAAGGATCTGGGAGCCGGGAATTTTGGGGTGGCGAGGTTGGTGAAGGATAAAAGGACAGGGGAGCTCGTCGCCGTCAAGTATATTGAAAGAGGGAAGAAGATTGATGAGCATGTACAACGAGAAATAATTAACCACAGGTCATTGAGGCATCCAAATATTGTGCGGTTTAAGGAGGTGGTGCTGACACCAACACACCTAGCTATAGTTATGGAATATGCTGCTGGCGGTGAACTCTTTGAAAGGATATGCAATGCTGGTCGGTTTAGTGAAGATGAGGCAAGGTTCTTTTTTCAGCAGCTGATATCAGGAGTCAGCTATTGTCATTCTATGGAAATCTGTCACCGTGATCTTAAACTTGAGAACACTCTCTTGGAT…
evm.model.scaf_1223.4	ATGGTTGCTCATCGGGACTTGAAGCCAGAGAACTTGTTGTTGGATTCAAAGTGCAATGTTAAAATTGCTGACTTTGGCTTAAGTAATGTTATGCGTGATGGCCATTTTCTGAAGACTAGCTGTGGAAGCCCAAATTATGCTGCTCCTGAGGTCATTTCTGGAAAACTTTATGCTGGACCTGAGGTTGATGTGTGGAGTTGTGGTGTCATTCTGTACGCTCTTCTTTGTGGTACCCTTCCTTTTGACGATGAGAATATACCAAACTTATTTAAGAAAATAAAGGGAGGAATATATACTCTTCCTAGCCATTTGTCTGCCCTTGCCCGAGATTTGATTCCAAAAATGCTGGTTGTTGATCCTATGAAGAGAATAACCATTCCTCAGATCCGTGAACATGCA…
evm.model.scaf_154.85	ATGGAAGGATCTGGTAGAGGAGGTGGCAGTGCTGATGTGGTATTGCAAAATTATAAACTAGGAAAGACTCTTGGCATTGGATCATTTGGCAAAGTTAAGATTGCAGAGCATTTGTTGACAGGGCACAAGGTGGCTATCAAGATTCTTAACCGTCGTAAAATAAAGAACATGAAAATGGAAGAAAAAGTGAGACGAGAGATCAAAATATTAAGACTATTTATGCATCCTCATATCATCCGTCTTTATGAGGTGATTGAGACTCCGTCAGATATTTATGTTGTTATGGAGTATGTTAAGTCGGGAGAGCTATTTGATTATATTGTTGAAAAGGGAAGGCTACAAGAGGATGAAGCTCGTCACTTCTTCCAACAGATCATATCTGGTGTTGAATATTGCCAT…
evm.model.scaf_102.99	ATGAATACAACTAAGATCAAACGGAGAGTCGGTAAATATGAGCTGGGACGCACGATCGGAGAAGGAACATTTGCCAAGGTCAAGTTTGCAAGGAATATCGAAACTGGAGAACCTGTTGCCATCAAGATTCTCGACAAGGAGAAAGTTCTCAAACACAAATTAGTCGAACAGATCAAGCGAGAAGTAGCTACGATGAAGTTAATAAAGCATCCTAATGTTGTTCGCATCTATGAGGTGATGGGAAGCAAATCAAAGATTTTCATTATACTTGAATTTGCTACAGGGGGAGAGCTTTTCGACAAAATAGTAAACCATGGCCGTATGAGGGAAGACGAAGCACGAAGATATTTCCAACAACTTATCAATGCGGTCGATTACTGCCATAGCAGGGGAGTTTAC…
evm.model.scaf_256.98	ATGGAGGACTGCGGTGGCGGCGGCGTCCTCCAAGGCCGCTATGAGCTCGGCCGCGTTCTGGGCCGCGGTTCCTTCGGGAAAGTCCACCTCGCCCGCGACCTCTGCGCCGGGCGGAGCGTAGCGGTCAAGGTGGTGGACAAGGCGACCGTCGTCCGCGCAGGGATGATGGATCATCTTAAGCGCGAGATCTCCGCCATGCGGATGGTCCGCCACCCCAACGTGGTCGCGCTCCACGAGGTCATGGCCACCCGATCCAAGATCTACCTCGCGATGGAGCTCGTCCGCGGCGGCGAGCTCTTCGCCCGCGTCGCCCGCGGCGGGCGCCTCTGCGAGTCCGCCGCGCGCCGGTACTTCCGTCAGCTAATCTCGGCCGTCGATTTCTGCCACCGGCGCGGCGTC…
evm.model.scaf_279.1	ATGGCCTCGGTGGGGAGGACGGCGAGGGTTGGGAAGTACGAGCTGGGCCGGACGCTCGGCGAGGGGACCTTCGCCAAGGTGAAGTTTGCTAAGAACGTGGAGACAGGGGAGGGCGTCGCCATCAAGATTCTCGACAAAGAAAAGATCTTGCGGCATAAGATGGTCGGTCAGATAAAACGTGAGATCTCAACAATGAAACTGATCAGACATCCGAATGTCATACGGATGTATGAGGTGATGGCTAGCAAGACAAAGATATACATAGTTATGGAATTTGTGACTGGGGGCGAATTCTTTGACAAGATTGCTCGTAATGGAAAATTAAAGGAGGATGAAGCTAGAAAATACTTCCAACAACTAATTAATGCTGTTGATTATTGCCATAGTCGAGGTGTTTCC…
evm.model.scaf_114.20	ATGAGCAACGGAGGCTGCGGCGTCGGAGGAGGAGGGATGGCGACGCGGACGCGGGTGGGGAAGTACGAGCTCGGGCGGACCCTCGGCGAGGGAAGCTTTGCCAAGGTCAAGTACGCCCGCAACGTGCAGACCGGAGACAGCGTCGCCATCAAGATCCTCGACAAGCACCATGTCCTCCGCCACAAGATGGTCGAGCAGATAAAAAGAGAGATATCTACCATGAAGCTGATTAAGCATCCAAATGTTGTCCAAATTCACGAGGTCATAGCTAGCAAGACAAAGATATACATTGTTCTTGAATTAGTTGATGGAGGCGAGCTTTTTGACAAAATAGCCAACCATGGAAAATTAAAAGAAGATGAAGCAAGGAGATACTTTCAGCAACTAATCAATGCTGTG…
evm.model.scaf_26.164	ATGGAACATGCAGGGAAAATAGTGATGCAACGGTTTGAATTAGGGAGATTGCTTGGACAGGGCAACTTTGCAAAGGTTTATTATGCCAGGAATCTTAAAACTGGCCAGGGCGTTGCTATTAAGATATTTGACAAAGAGAAATTAATGAGAGTGGGTCTTATCGAACGGACCAAGCGTGAGATATCAGTGATGAGATTAGTGCGGCACCCGAATGTCGTGCACCTGTTTGAGGTCATGGCTAGCAAGAGAAAGGTTTATTTTGTCATGGAGCATGTAAAAGGCGGTGAGTTATTTGATAAGATTGCCAAAGGTAAACTAGATGAGGATGTTGCACGAAGATACTTTCAGCAACTTGTCATTGCTGTTGATTACTGCCATAGCCGAGGTGTTTATCACAGG…
evm.model.scaf_74.133	ATGGAAGAAGAAGCCGCGCCGGAGACGAGCTTGGCCGAGAAGAGGAGGAAGAAGGATATCGGAGGAGGTGGTCTCCTCCTCGGGCGGTTTGATGTCGGCAGGCTCCTCGGTGCTGGTTCCTTCGCCAAGGTCTACGTCGCTCGCGACGTCCGCACCGATGAGCTCGTGGCCATCAAGGCGCTTGACAAGGAGAAGATCGTCAAGGGAGGGTTCGCCGCGCACATCGAGCGCGAGATCGCCATACTCCGCCGGGTACGTCATCCCTACATCGTGCAGCTCTTCGAGGTCATGGCGACCAAGACCAAGATCTATTTCGTCATGGAGTACGTCCGCGGCGGCGAGCTATTCGGCCGTGTCGCTAAGGGGCGCCTCCTCGAGGACACCGCCCGCCGCTACTTC…
evm.model.scaf_115.24	ATGGCAGCGTCGACGCCGGCGAAGTTAGGGAACCAGTCGAAGAGGCCGGCGAAGAAGGAGCCAAAGCTACTTCTTGGCCGCTTCGAGGTGGGGAAGCTGCTCGGCGCCGGGACCTTCGCCAAGGTCTATGTCGCCCGCAACGTGCGCACGGACGATCTCGTGGCGATCAAGGCACTCAGCAAGGAGAAGATCGTCAAGTGGGGGCTCGTCACCCACATCAAGCGCGAGATCGCCATCCTTCGGCGTGTCCGCCATCCCTACGTCGTCCAGCTTTTCGAGGTCATGGCCACCAAGACCAAGATCTACTTCGTCATGGAGTACGTCCGTGGAGGGGAGCTGTTCTCGCGCGTCTCGAAGGGCCGACTCCGGGAGGATACCGCGCGCCGCTACTTCCAGCAG…
evm.model.scaf_286.62	ATGCGGAAGCGGGTGGGGAAGTACGAGCTTGGGCGGACTCTCGGCGAGGGGAGCTTCGCCAAGGTCAAGTACGCGCGCAACGTGCAGACCGGAAACAGCGTCGCCATAAAGATCCTCGACAAGCACCACGTCTTCCGCCACAATATGGTCGAGCAGATAAAAAGAGAGATATCTACCATGAAGTTGATTAAGCATCCAAATGTTGTCCAAATTTCTGAGGTCATAGCTAGCAAGACAAAGATATACATTGTTCTTGAATTTGTGGATGGAGGCGAGCTCTTTGACAAAATAGTCAACCATGGCAGACTAAAACAAGATGAAGTAAGGAGATACTTTCACCAACTAATTGATGCTGTTGATTACTGTCACAGTAGAGGTGTATACCACAGAGATTTAAAG…
evm.model.scaf_747.7	ATGACAGTAGTAGAAAACAAGGGGAGTGTGTTGATGAAGAAGTATGAAATTGGGAGATTCCTAGGTAAGGGAACTTTTGCCAAGGTTTACTATGCAAGGGATGTTAAAACTTCACAAAGTGTTGCTATTAAGGTAATCGACAAAGAGAAGGTGTTTAAGGTTGGCTTGAATGATCAGATTATGCGAGAGATATCGGTGATGAGAATGGTGAGGCATTCAAATGTCTTGGAGCTTTATGAAGTCATGGCTACCAGATCTAAGATATACTTTGTCCTGGAATATGCCAAAGGTGGTGAGCTGTTTAACAAAGTTGTTAAAGGGAAACTCAGAGAAGATGTTGCCCGGAAATATTTTCAGCAGCTGATTAGTGCGATAGATTTTTCTCATAGCCGAGGCGTC…
evm.model.scaf_369.81	ATGAAGGAGGGAGAGGAGTCAGAGCGGAGGAGCAGGCCTGGAATGCGATCGTTGCTGTCGAAGTACGAGGTGGGGAGGACGCTGGGCGAGGGCAACTTCGGGAAGGTTAAGTACGCGAGGCACGTTGAGACCGGCCGCTCCTTTGCCGTCAAGATCCTCGACCGCAAGCGCATCCAATCGCTCAACCTCGACGACCAGATCAAGAGGGAGATCGGCACCTTGAAGCTTCTCAAGCACCCCAACATCGTTCGCCTGTACGAGGTGTCCGCTAGCAAAATCAAGATTTACATGGTCCTGGAATACGTAAATGGTGGCGAATTGTTCGACATAATTCCCGCGAAGGGACAGCTTTCTGAAAAGCAAGGACGGCATTTTTTTCAACAGTTGATTGATGCAATT…
evm.model.scaf_479.26	ATGGATCGCGCTGCGCTAACGGTCGGTCCGGGGATGGACCTGCCGATAATGCACGACAGCGATAGGTACGAGCTGGTGAAGGACATCGGGTCGGGGAACTTCGGGATCGCCCGGCTGATGAGGGACAAGCAGACCAAGGAGCTCGTCGCCGTCAAGTACATCGAGAGAGGCGAGAAGATAGATGAAAATGTTAAAAGAGAGATAATTAACCATCGGTTGTTGAGGCATCCTAATATCATCAGATTCAGAGAGGTTATTTTAACTCCGACCCATCTCGCTATTGTTATGGAATATGCTTCTGGTGGTGAGCTTTTTGAACGTATTTGTGACGCGGGGCGCTTCAGTGAGGATGAGGCACGGTTCTTCTTCCAGCAACTTATATCCGGAGTAAGCTACTGT…
evm.model.scaf_71.72	ATGAAGTTAATAAAGCATCCTAATGTTGTTCGCATCTATGAGGTGATGGGGAGCAAAACAAAAATTTTCATTGTACTTGAATTCATTACAGGAGGAGAGCTGTTAGATAAAATAATAAACCATGGTAGGATGAGGGAGAGCGAGGCCCGGAAATATTTCCAACAACTAATTAATGCTGTTGATTATTGTCATAGCAGGGGAGTTTACCACCGCGATCTGAAGCCAGAGAACTTGTTACTTGATGCTTATGGGAACTTGAAAATTTCAGACTTTGGCTTAAGTGCATTATCTCAGCAAGTCAGGGGCGATGGCTTGCTTCATACTGCCTGTGGTACTCCAAACTATGTCGCTCCAGAGGTTCTAAATGATAGAGGTTATGATGGAGCCACTGCAGATTTA…
evm.model.scaf_171.23	ATGGGTAGCCGACAACCATCGCCTTCCACCGCCGCCGCCGCCAAGCCCCGCCACCACGAGGTGCTCCTCGGAAAGTACGAGCTCGGGCGCCTCCTTGGCCGCGGCACCTTCGCGAAGGTCTACCTCGCCCGCTCCGTCTCGGACGGCACCGACGTCGCCGTGAAGATCCTCGACAAGGCGGAGATGGTGGAGACGGGGATGGCCGACAGCGTGCTCACTGAGGTCGCCGCCATGCGCCGCCTCTCTCACCCCAACATCCTCAAGCTCCACGAGGTGCTCGCGACGCGGTCCAAGATCTTCCTCGTCATGGAGCACGCCCCTGGCGGCGACCTCCTCGGCCGCGTCGCCCGCCGCCGCCTCCCGGAGCACGCCTCCCGGCGCTACTTCCACCAGCTCGTC…
evm.model.scaf_484.67	ATGGCGGAGGCAGAAGCGGCGAGGCTGGAGTGCCATCCGGCCAAGCGAGTGAAGACGGGGGCCAAGCTTCTGCTTGGCCGCTACGAGCTTGGCAAGCTTCTCGGCGCCGGAACCTTCGCCAAGGTGTACGTCGCCCGTAACGAGAAGACGGAAGAGGATGTGGCGATCAAGGTCCTGGACAAGGAGAAGATAGTGAAGTTGGGGCTTGTCGCGCTCATCAAGCGCGAGATCGCCATCCTCCGACGCGTCCGCCACCCTTACATCGTGCAGCTCTTAGAGGTCATGGCCACTAGTACGTTCCGCGGCGGCGAGCTCTTCACCCGCGTCTCCAAGGGACGGCTCAAGGAAGACACCGCCCGCCGCTACTTCCAGCAGCTGATTTCTGCGGTGGCGTTCTGC…
evm.model.scaf_484.68	ATGGAGAAGAAGGGCGCCGTGACCGTTCTGATGAACCGGTACGAGCTGGGGAGGCTGCTGGGGCAGGGCACGTTCGCGAAGGTGTACCAGGCGCGGAACCTTGCCACCGGAGCCATCGTCGCCATCAAGGTCATCGACAAGGAGAAGGTGCTCCGGGTGGGGATGATCGACCAGATCAAGCGCGAGATCTCGGTCATGCGCCTCGTCCACCACCCCAACATCGTCGAGCTCTACGAGGTGATGGCGACGCGCAGCAAGATCTACTTTGCGATGGAGTACGTCCGCGGCGGCGAGCTTTTCAGTAAGGTGGCGAAGGGGCGGCTAAAGGAGGACACCGCCCGGAAGTACTTCCACCAGCTGATCGCCGCCGTGGACTTCTGCCACAGCCGCGGCGTCTAC…
evm.model.scaf_55.127	ATGGAGTCGGTGGGGCGGATGAGGGTTGGGAAATACGAGCTCGGGCGGACGCTCGGCGAGGGCACCATCGCTAAGGTCAAGTTCGCCAAGGACGTGGAGACCGGGGAGAGCGTGGCCATCAAGATCTTCGATAAAGACAAGATCTTGCGGCATAAGATGGTCGGCCAGATAACACGTGAAATCTCAACTATGAAACTGATTAGGCATCCGAATGTCATTCGGATATATGAGGTCATAGCCAGCAAGACGAAAATATACTTAGTTTTGGAATTCGTAGATGGTGGTGAACTCTTTGACAAAATTGCTAGTAGGGGAAAGTTAAAGGAAGAAGAAGCTAGAAAGTACTTTCAACAATTAATCAATGCTGTAGATTATTGTCATAGTAGAGGTGTCTTCCAC…
evm.model.scaf_3.374	ATGAAGAGGGATGCAGAGGTGGTGCGGGTGGGAAAGTATGAGATCGGGCGGACGCTCGGCGAGGGTAACTTCGCCAAGGTCAAGCTCGCCCGCCACGTCGATTCCGGCCGATGCTTCGCCGTCAAGATCCTCGAGCGCAAGCGCGTCCTCGATCTCCGAACCCACGACCAGATTAAGAGGGAGATTGCGACGCTGAAGCTGCTCAGGCATCCAAATGTTGTCAGATTGTTTGAGGTCCTGGCAAGCAAGACAAAGATTTACATGGTTCTTGAATATGAAACTGGCGGTGAGCTTTTTGATAGAATTGAATCTAAAGGAAGGCTTCCAGAACCTGAAGGGCGCAAACTCTTTCAGCAACTCATTGATGCTGTCAGCTATTGCCATGAGAAAGGTGTATTC…
evm.model.scaf_247.6	ATGGAGGAGGTACCGTCGCCGGCGCCGTCCGCGGAAGGGCAGAGTGTTCTCCATCGGCGGTACGAGCTAGGGAGAGTCATCGGGCAGGGCACCTTCGCGAAGGTGCACCTGGCGCGGAACCTGCTCACTGGCAAGTGCGTGGCCATCAAGGTGGTGGGGAAGGAGAAGGTCATCCAGGCGGGGATGATGGAGCAGGTGAAGCGTGAGATCTCGGTGATGAAGATGGTTCGCCACCCCAATATCGTGGAGCTTCACGAGGTGATGGCGACGCGCAGCAAGATCTACTTCGCCATGGAGCTGGTTCGTGGTGGCGAACTGTTCGCCAAGGTGGCTCGCTCCGGCCGCCTCCGCGATGACGCCGCCCGGCACTACTTCCGCCAGCTCGTCTCCGCCGTCGAC…
evm.model.scaf_280.50	ATGGAATTAGAAAACAAAGGAAATGTGTTGATGTGCAAGTACGAGGTTGGAAGAATGTTAGGGAAAGGTACTTTTGCCAAGGTTTACTATGCGAGGGACTTGAAGACTTCCCAGAGTGTTGCGATAAAGGTGATTGACAAAGAGAAGGTGTTTAAGGTTGGACTTAATGATCAGATTAAACGAGAGATATCAGTGATGAGATTGGTGAAGCATCCAAACATCGTAGAGCTTTACGAGGTCATGGCCACCAAATCTAAGATATACTTTGTTCTGGAGTATGTCAAAGCTGGTGAGCTGTTTAACAAAGTCGCCAAGGGCAAACTTAAAGAAGATGTTGCCCGTAAGTATTTTCAGCAGCTGATCAGTGCTGTGGATTTCTGCCATGGCAGAGGTGTCTAC…
evm.model.scaf_438.54	ATGGAGGAGCTGCCTCCGGAGACGGCGTCGCCGGAGGGGAAACGTCCCCTTCACGGCCGCTACGAGCTCGGGCCCGTGCTGGGCTACGGCACCTTCGCCAAGGTCTATCTTGCGCGTGACGTGCGCAGCGGTAAGGGGGTGGCCGTGAAGGTGGTGGCCAAGGACAAGGTGCTCCGCGCCGGCATGGAAGAGCAACTGAAGCGCGAGATCGCCGTCATGAGGGCGGTCCGGCACCCGAACATCGTCGAGCTTCACGAGGTGATGGCCAGCCGCTCCCGCATCTTCTTCGCCATGGAGCTCGTCCGCGGCGGCGAGCTCTTCGCGCTCATCGCCCGCCACGGCCGCCTCCATGACGACGCTGCGCGTCGCTACTTCGGGCAACTCATCTCCGCCGTCGAC…
evm.model.scaf_438.56	ATGGGAAAGGAATCGGAGACGAGGAATCTGGTATTGGGCAAGTACGAGATGGGGCGAGTCCTGGGAAAGGGCACCTTTGCCAAGGTGTATCTCGGCCGCGACCTTCGCACGAGGGAGAGCGTCGCCATCAAGGTTATCCACAAGGACCGGATCCGCCGGGAAGCCGGAATGGCGGAGCAGATCGAGCGGGAGATCTCGGTGATGCGCCTCGTCCGCCATCACCACGTGGTGGAGCTCCGCGAGGTGATGGCCACCAGATCTCGCATCTTCTTCGTGATGGAGTACGTCCGCGGCGGCGAGCTCTTCGCGCGCGTCGCCCGGGGGGCCCTGCCGGAGGACCAGGCTCGCCGCTACTTCCGTCAGCTCATCTCCGCCGTCGACTTCTGCCACCGTCGCGGC…
evm.model.scaf_439.14	ATGAATACAACCAAAGTCAAGCGAGTCAGTAAATATGAGCTGGGGCGCACGATCGGAGAAGGAACCTTTGCCAAGGTCAAGTTTGCAAGGAATATCGAAACTGGAGAGCCTGTTGCTATCAAGATTCTCGACAAGGAGAAAGTTCTCAAACACAAATTAGTCGAACAGATCAAGCGAGAAGTAGCCACTATGAAGTTAATAAAGCATCCTAATGTCGTTCGCATCTATGAGGTGATGGGAAGCAAATCAAAGATTTTTATTGTACTTGAATTTGCGACAGGAGGAGAGCTTTTTGACAAAATAGTAAACCATGGTCGGATGAGGGAAGACAAAGCACGAAGATATTTCCAACAACTTATCAATGCGGTTGATTATTGCCATAGCAGGGGAGTTTACCAT…
evm.model.scaf_25.126	ATGGAAGGATCTGGTAGAGGTAGCAGTGTTGATGTGGTCTTGCAAAATTATAAGCTAGGAAAGACTCTTGGCATTGGGTCATTTGGCAAGGTTAAAATTGCAGAGCACTTGTTGACGGGCCACAAGGTTGCCATCAAGATCCTCAACCGTCACAAAGTAAAGAGCTTGGAAATGGAAGAAAAAGTGAGACGAGAAATCAAAATTTTAAGATTATTTATGCATCCTCATATTATACGTCTATATGAGGTGATTGAGACACATTCAGACATTTATGTTGTCATGGAGTATGTTAAGTCGGGCGAGCTATATGATTATATTACTCAAAAGGGAAGGTTACAAGAGGATGAAGCTCGTCACTTCTTCCAACAGATTATATCTGGCGTGGAGTACTGCCATAGA…
evm.model.scaf_25.205	ATGGATCTGCCGATAATGCACGACAGCGATCGGTACGAGCTGGTGAAGGACATCGGGTCGGGAAACTTTGGGATCGCCAGGCTGTTGCGGGACAAGCAGACCAAGGAGCTCGTTGCTGTCAAGTACATCGAGAGAGGCGAGAAGATAGACGAAAATGTTAAGAGAGAGATAATTAACCATCGGTTGTTGAGGCATCCTAATATAATCAGATTTAAAGAGGTTATTTTAACTCCAACCCATTTGGCGATTGTCATGGAATATGCTTCTGGTGGTGAACTTTTTGAACGAATTTGCAATGCAGGACGCTTCAGTGAGGATGAGGCGCGATTTTTCTTCCAGCAACTTATATCTGGAGTTAGCTATTGTCACTCGATGCAAGTATGCCACCGTGATTTGAAG…
