# Supplementary material for: Genome-wide identification and expression pattern of SnRK gene family under several hormone treatments and its role in floral scent emission in Hedychium coronarium
Source: PeerJ. 2021 Mar 10;9:e10883. doi: 10.7717/peerj.10883 (PMC7955670; doi:10.7717/peerj.10883)
Supplement: Supplemental Information 3 [file peerj-09-10883-s003.xls]

## Sheet: Figure7-qPCR date
NAME	ABA									IAA									JA									ET
	RQ	（RQ-2^-(ΔΔCт+ΔCт SE)）	（2^-(ΔΔCт-ΔCт SE)-RQ）	RQ	（RQ-2^-(ΔΔCт+ΔCт SE)）	（2^-(ΔΔCт-ΔCт SE)-RQ）	RQ	（RQ-2^-(ΔΔCт+ΔCт SE)）	（2^-(ΔΔCт-ΔCт SE)-RQ）	RQ	（RQ-2^-(ΔΔCт+ΔCт SE)）	（2^-(ΔΔCт-ΔCт SE)-RQ）	RQ	（RQ-2^-(ΔΔCт+ΔCт SE)）	（2^-(ΔΔCт-ΔCт SE)-RQ）	RQ	（RQ-2^-(ΔΔCт+ΔCт SE)）	（2^-(ΔΔCт-ΔCт SE)-RQ）	RQ	（RQ-2^-(ΔΔCт+ΔCт SE)）	（2^-(ΔΔCт-ΔCт SE)-RQ）	RQ	（RQ-2^-(ΔΔCт+ΔCт SE)）	（2^-(ΔΔCт-ΔCт SE)-RQ）	RQ	（RQ-2^-(ΔΔCт+ΔCт SE)）	（2^-(ΔΔCт-ΔCт SE)-RQ）	RQ	（RQ-2^-(ΔΔCт+ΔCт SE)）	（2^-(ΔΔCт-ΔCт SE)-RQ）	RQ	（RQ-2^-(ΔΔCт+ΔCт SE)）	（2^-(ΔΔCт-ΔCт SE)-RQ）	RQ	（RQ-2^-(ΔΔCт+ΔCт SE)）	（2^-(ΔΔCт-ΔCт SE)-RQ）
HcSnRK1.1	1	0.06474	0.06474	1.74005	0.26689	0.26689	1.53744	0.16677	0.16677	1	0.2889	0.2889	1.75682	0.09515	0.09515	4.67127	0.65501	0.65501	1	0.06474	0.06474	1.80005	0.32835	0.32835	3.60682	0.04218	0.04218	1	0.16022	0.16022	4.3602	0.20211	0.20211	5.50111	0.22613	0.22613
HcSnRK1.2	1	0.05225	0.05225	1.44439	0.30229	0.30229	1.80536	0.12295	0.12295	1	0.30363	0.30363	0.44805	0.08002	0.08002	2.51046	0.42777	0.42777	1	0.05225	0.05225	2.44501	0.41452	0.41452	0.79967	0.10926	0.10926	1	0.02771	0.02771	2.65444	0.2825	0.2825	2.8412	0.04199	0.04199
HcSnRK1.3	1	0.08136	0.08136	0.45577	0.01748	0.01748	0.55787	0.00508	0.00508	1	0.08136	0.08136	0.61871	0.0258	0.0258	0.54777	0.11589	0.11589	1	0.08136	0.08136	0.70894	0.02725	0.02725	0.77131	0.01262	0.01262	1	0.08136	0.08136	0.30236	0.03161	0.03161	0.42369	0.00748	0.00748
HcSnRK2.1	1	0.11485	0.11485	0.64301	0.10122	0.10122	0.25649	0.07052	0.07052	1	0.05107	0.05107	1.74242	0.14116	0.14116	0.94634	0.08287	0.08287	1	0.05107	0.05107	0.55051	0.03737	0.03737	0.66412	0.02804	0.02804	1	0.24478	0.24478	4.79931	0.81076	0.81076	3.09432	0.49792	0.49792
HcSnRK2.2	1	0.2879	0.2879	2.20723	0.40413	0.40413	0.13643	0.05165	0.05165	1	0.14563	0.14563	1.93766	0.17584	0.17584	0.53057	0.05268	0.05268	1	0.1879	0.1879	2.3429	0.05963	0.05963	0.22694	0.00877	0.00877	1	0.08892	0.08892	5.77384	0.87432	0.87432	0.52888	0.07171	0.07171
HcSnRK2.3	1	0.23661	0.23661	0.8253	0.17418	0.17418	0.75512	0.21129	0.21129	1	0.06874	0.06874	1.11617	0.11189	0.11189	0.66821	0.06153	0.06153	1	0.06874	0.06874	1.00439	0.04202	0.04202	1.51451	0.01941	0.01941	1	0.24386	0.24386	1.11764	0.20141	0.20141	1.1624	0.17484	0.17484
HcSnRK2.4	1	0.0989	0.0989	1.95762	0.4684	0.4684	3.98575	0.70834	0.70834	1	0.08341	0.08341	1.50839	0.13192	0.13192	0.38826	0.0413	0.0413	1	0.08341	0.08341	0.56517	0.00817	0.00817	0.71912	0.01655	0.01655	1	0.05054	0.05054	9.40802	1.21855	1.21855	11.1546	0.07248	0.07248
HcSnRK2.5	1	0.08097	0.08097	0.31084	0.01098	0.01098	0.50191	0.00821	0.00821	1	0.08097	0.08097	0.70404	0.02153	0.02153	0.61933	0.01612	0.01612	1	0.08097	0.08097	0.66892	0.02902	0.02902	0.58273	0.01292	0.01292	1	0.08097	0.08097	0.3047	0.01093	0.01093	0.38121	0.0105	0.0105
HcSnRK2.6	1	0.16216	0.16216	1.89503	0.22718	0.22718	1.17603	0.09412	0.09412	1	0.07349	0.07349	1.49593	0.12897	0.12897	0.86108	0.07348	0.07348	1	0.07349	0.07349	2.34212	0.05477	0.05477	0.70312	0.00808	0.00808	1	0.04037	0.04037	1.08613	0.05483	0.05483	0.86775	0.03232	0.03232
HcSnRK2.7	1	0.09892	0.09892	1.16351	0.14791	0.14791	0.42345	0.01204	0.01204	1	0.08253	0.08253	1.57797	0.16637	0.16637	1.01851	0.09243	0.09243	1	0.08253	0.08253	0.8038	0.0271	0.0271	2.67552	0.02661	0.02661	1	0.18202	0.18202	0.29962	0.05938	0.05938	0.48845	0.07381	0.07381
HcSnRK2.8	1	0.08117	0.08117	0.38331	0.01423	0.01423	0.52989	0.00664	0.00664	1	0.08117	0.08117	0.66138	0.02366	0.02366	0.58355	0.066	0.066	1	0.08117	0.08117	0.68893	0.02813	0.02813	0.67702	0.01277	0.01277	1	0.08117	0.08117	0.30353	0.02127	0.02127	0.40245	0.00899	0.00899
HcSnRK2.9	1	0.18768	0.18768	2.10135	0.38946	0.38946	0.5329	0.11182	0.11182	1	0.05954	0.05954	1.87375	0.27372	0.27372	0.57276	0.06568	0.06568	1	0.05954	0.05954	4.09125	0.63202	0.63202	0.60328	0.0603	0.0603	1	0.02179	0.02179	3.31395	0.14561	0.14561	0.59732	0.04815	0.04815
HcSnRK2.10	1	0.15379	0.15379	0.53165	0.08749	0.08749	1.39369	0.38347	0.38347	1	0.15423	0.15423	1.72518	0.1594	0.1594	1.26169	0.10349	0.10349	1	0.15423	0.15423	1.02414	0.01677	0.01677	1.47693	0.18433	0.18433	1	0.35446	0.35446	0.91818	0.15885	0.15885	3.63806	0.63461	0.63461
HcSnRK2.11	1	0.21632	0.21632	0.37521	0.06589	0.06589	0.3197	0.08847	0.08847	1	0.09182	0.09182	1.2843	0.16097	0.16097	1.24547	0.12002	0.12002	1	0.09182	0.09182	0.64307	0.01004	0.01004	1.48829	0.08338	0.08338	1	0.20317	0.20317	0.9089	0.21569	0.21569	0.87328	0.14895	0.14895
HcSnRK2.12	1	0.0047	0.0047	1.84416	0.31614	0.31614	1.57831	0.05036	0.05036	1	0.0699	0.0699	0.65993	0.06732	0.06732	0.58504	0.05301	0.05301	1	0.0699	0.0699	0.44046	0.00479	0.00479	2.07272	0.01408	0.01408	1	0.18203	0.18203	1.00232	0.19381	0.19381	1.34184	0.22728	0.22728
HcSnRK2.13	1	0.03925	0.03925	0.44378	0.06285	0.06285	0.29902	0.01009	0.01009	1	0.07538	0.07538	0.54947	0.06996	0.06996	0.30525	0.02747	0.02747	1	0.07538	0.07538	0.15131	0.01078	0.01078	0.59988	0.04298	0.04298	1	0.18206	0.18206	1.77216	0.2994	0.2994	2.19211	0.38907	0.38907
HcSnRK3.10	1	0.017	0.017	1.43943	0.0532	0.0532	1.85145	0.13263	0.13263	1	0.09523	0.09523	0.75498	0.04059	0.04059	0.80841	0.11335	0.11335	1	0.017	0.017	1.04849	0.08076	0.08076	1.16062	0.08409	0.08409	1	0.03511	0.03511	6.05429	0.16842	0.16842	7.39562	0.31318	0.31318
HcSnRK3.13	1	0.01497	0.01497	1.4727	0.10232	0.10232	1.47492	0.17258	0.17258	1	0.01917	0.01917	0.68683	0.02321	0.02321	1.37645	0.13737	0.13737	1	0.01497	0.01497	1.17604	0.04113	0.04113	2.33179	0.13063	0.13063	1	0.02784	0.02784	1.32055	0.01799	0.01799	1.90739	0.0545	0.0545
HcSnRK3.17	1	0.03085	0.03085	1.59471	0.16587	0.16587	2.0611	0.15512	0.15512	1	0.05009	0.05009	0.87046	0.01855	0.01855	1.60199	0.15672	0.15672	1	0.03085	0.03085	0.98342	0.04528	0.04528	1.86089	0.09555	0.09555	1	0.14099	0.14099	2.3018	0.11132	0.11132	2.42757	0.0685	0.0685
HcSnRK3.21	1	0.06438	0.06438	0.86235	0.05736	0.05736	1.7499	0.14861	0.14861	1	0.08036	0.08036	0.489	0.05171	0.05171	0.78619	0.087	0.087	1	0.06438	0.06438	1.11847	0.05156	0.05156	2.09201	0.11076	0.11076	1	0.17533	0.17533	3.11729	0.28711	0.28711	4.77264	0.16905	0.16905
HcSnRK3.22	1	0.06949	0.06949	0.9931	0.1606	0.1606	1.09476	0.07547	0.07547	1	0.27852	0.27852	1.08028	0.06403	0.06403	2.98991	0.45058	0.45058	1	0.06949	0.06949	1.32817	0.19271	0.19271	2.54433	0.08923	0.08923	1	0.04604	0.04604	0.25598	0.01232	0.01232	0.27411	0.00795	0.00795
HcSnRK3.23	1	0.0462	0.0462	1.28373	0.27576	0.27576	1.89491	0.1319	0.1319	1	0.26895	0.26895	0.5183	0.04485	0.04485	1.23897	0.28543	0.28543	1	0.0462	0.0462	2.25892	0.32798	0.32798	1.4354	0.05606	0.05606	1	0.0474	0.0474	1.09148	0.18677	0.18677	1.82474	0.24956	0.24956
HcSnRK3.24	1	0.29018	0.29018	0.17252	0.00835	0.00835	0.41804	0.11542	0.11542	1	0.06394	0.06394	0.36887	0.0342	0.0342	0.36597	0.02988	0.02988	1	0.29018	0.29018	0.33346	0.00599	0.00599	0.21889	0.01012	0.01012	1	0.04927	0.04927	3.27255	0.45693	0.45693	4.46559	0.14757	0.14757
HcSnRK3.26	1	0.03159	0.03159	1.26258	0.05743	0.05743	1.61867	0.21102	0.21102	1	0.06896	0.06896	1.08323	0.08078	0.08078	1.7425	0.17034	0.17034	1	0.03159	0.03159	1.64362	0.16062	0.16062	3.7712	0.23886	0.23886	1	0.02794	0.02794	0.95941	0.12679	0.12679	2.03579	0.07659	0.07659
HcSnRK3.29	1	0.04548	0.04548	1.58794	0.24645	0.24645	1.59326	0.06045	0.06045	1	0.29686	0.29686	0.59811	0.02924	0.02924	2.15081	0.35935	0.35935	1	0.04548	0.04548	1.34792	0.20777	0.20777	1.43165	0.03405	0.03405	1	0.02548	0.02548	2.12707	0.09846	0.09846	2.83498	0.04326	0.04326
HcSnRK3.31	1	0.04525	0.04525	1.44132	0.19217	0.19217	1.95921	0.23166	0.23166	1	0.04732	0.04732	1.90626	0.16597	0.16597	1.80194	0.23528	0.23528	1	0.04525	0.04525	0.76281	0.13029	0.13029	2.75227	0.10696	0.10696	1	0.08585	0.08585	1.02915	0.06729	0.06729	0.78371	0.08165	0.08165
HcSnRK3.32	1	0.04839	0.04839	1.99836	0.32209	0.32209	1.57948	0.25615	0.25615	1	0.26624	0.26624	0.72781	0.03325	0.03325	1.82253	0.30727	0.30727	1	0.04839	0.04839	1.84516	0.30463	0.30463	1.1468	0.01679	0.01679	1	0.04918	0.04918	2.91233	0.35082	0.35082	6.71654	1.13056	1.13056
HcSnRK3.33	1	0.019	0.019	1.61314	0.12392	0.12392	1.61826	0.16943	0.16943	1	0.03548	0.03548	0.62824	0.00623	0.00623	1.09192	0.12487	0.12487	1	0.019	0.019	1.35706	0.06705	0.06705	1.37037	0.0696	0.0696	1	0.18781	0.18781	7.00907	0.90694	0.90694	5.25575	0.27764	0.27764
HcSnRK3.39	1	0.04567	0.04567	1.79293	0.28945	0.28945	1.86935	0.02804	0.02804	1	0.2665	0.2665	0.47144	0.03651	0.03651	1.55306	0.26405	0.26405	1	0.04567	0.04567	2.12471	0.28553	0.28553	1.01648	0.02022	0.02022	1	0.0346	0.0346	4.54709	0.04201	0.04201	6.25591	0.27983	0.27983

## Sheet: Figure9-qPCR date
														Relative gene expression
BSMV-HcSnRK2.2							BSMV-HcSnRK2.9							TPS1										TPS3										TPS5
CK			HcSnRK2.2				CK			HcSnRK2.9				CK			BSMV-HcSnRK2.2			BSMV-HcSnRK2.9				CK			BSMV-HcSnRK2.2			BSMV-HcSnRK2.9				CK			BSMV-HcSnRK2.2			BSMV-HcSnRK2.9
RQ	（RQ-2^-(ΔΔCт+ΔCт SE)）	（2^-(ΔΔCт-ΔCт SE)-RQ）	RQ	（RQ-2^-(ΔΔCт+ΔCт SE)）	（2^-(ΔΔCт-ΔCт SE)-RQ）		RQ	（RQ-2^-(ΔΔCт+ΔCт SE)）	（2^-(ΔΔCт-ΔCт SE)-RQ）	RQ	（RQ-2^-(ΔΔCт+ΔCт SE)）	（2^-(ΔΔCт-ΔCт SE)-RQ）		RQ	（RQ-2^-(ΔΔCт+ΔCт SE)）	（2^-(ΔΔCт-ΔCт SE)-RQ）	RQ	（RQ-2^-(ΔΔCт+ΔCт SE)）	（2^-(ΔΔCт-ΔCт SE)-RQ）	RQ	（RQ-2^-(ΔΔCт+ΔCт SE)）	（2^-(ΔΔCт-ΔCт SE)-RQ）		RQ	（RQ-2^-(ΔΔCт+ΔCт SE)）	（2^-(ΔΔCт-ΔCт SE)-RQ）	RQ	（RQ-2^-(ΔΔCт+ΔCт SE)）	（2^-(ΔΔCт-ΔCт SE)-RQ）	RQ	（RQ-2^-(ΔΔCт+ΔCт SE)）	（2^-(ΔΔCт-ΔCт SE)-RQ）		RQ	（RQ-2^-(ΔΔCт+ΔCт SE)）	（2^-(ΔΔCт-ΔCт SE)-RQ）	RQ	（RQ-2^-(ΔΔCт+ΔCт SE)）	（2^-(ΔΔCт-ΔCт SE)-RQ）	RQ	（RQ-2^-(ΔΔCт+ΔCт SE)）	（2^-(ΔΔCт-ΔCт SE)-RQ）
1	0.26947	0.26887	0.337	0.0433	0.04968		1	0.16591	0.19892	0.4159	0.03809	0.04193		1	0.14658	0.13042	0.32023	0.06027	0.06108	0.52185	0.08487	0.08578		1	0.18302	0.12703	0.33991	0.02338	0.02712	0.43894	0.05898	0.08066		1	0.1924	0.15341	0.48889	0.11255	0.13453	0.57816	0.13542	0.16395

## Sheet: Figure9-GC-MS date
BSMV	ug/g FW /h
ck1				SUM		S2.2-1				SUM		S2.9-1				SUM
Eucalyptol	109980187	Eucalyptol	5.57776	5.57776		Eucalyptol	72306684	Eucalyptol	2.54327	2.54327		Eucalyptol	126333170	Eucalyptol	4.00574	4.00574
ocimene	13162395	1,3,6-Octatriene, 3,7-dimethyl-, (E)-	0.667545	16.1321		ocimene	5609468	1,3,6-Octatriene, 3,7-dimethyl-, (Z)-	0.197304	6.6182		ocimene	375925740	1,3,6-Octatriene, 3,7-dimethyl-, (E)-	11.9197	11.9197
	303825483	1,3,6-Octatriene, 3,7-dimethyl-, (Z)-	15.4088				182549633	1,3,6-Octatriene, 3,7-dimethyl-, (Z)-	6.4209
	1097969	1,3,6-Octatriene, 3,7-dimethyl-, (Z)-	0.0556847
linalool	177709922	1,6-Octadien-3-ol, 3,7-dimethyl-	9.01275	9.01275		linalool	141078713	1,6-Octadien-3-ol, 3,7-dimethyl-	4.96222	4.96222		linalool	190929957	1,6-Octadien-3-ol, 3,7-dimethyl-	6.05395	6.05395
Decanoic acid, ethyl ester	34111486	Decanoic acid, ethyl ester	1.73	1.73		Decanoic acid, ethyl ester	49184837	Decanoic acid, ethyl ester	1.73	1.73		Decanoic acid, ethyl ester	54560860	Decanoic acid, ethyl ester	1.73	1.73
ck2						S2.2-2						S2.9-2
Eucalyptol	103330451	Eucalyptol	5.83709	5.83709		Eucalyptol	54467128	Eucalyptol	3.01431	3.01431		Eucalyptol	96601883	Eucalyptol	4.50344	4.50344
ocimene	11739427	1,3,6-Octatriene, 3,7-dimethyl-, (E)-	0.663155	16.8363		ocimene	3116958	1,3,6-Octatriene, 3,7-dimethyl-, (E)-	0.172498	8.25132		ocimene	9219236	1,3,6-Octatriene, 3,7-dimethyl-, (E)-	0.429788	13.3002
	285582703	1,3,6-Octatriene, 3,7-dimethyl-, (Z)-	16.1324				145006625	1,3,6-Octatriene, 3,7-dimethyl-	8.02494				276079467	1,3,6-Octatriene, 3,7-dimethyl-, (Z)-	12.8704
	719884	1,3,6-Octatriene, 3,7-dimethyl-, (Z)-	0.0406659				973675	1,3,6-Octatriene, 3,7-dimethyl-, (Z)-	0.053885
linalool	170627078	1,6-Octadien-3-ol, 3,7-dimethyl-	9.63865	9.63865		linalool	82171796	1,6-Octadien-3-ol, 3,7-dimethyl-	4.54754	4.54754		linalool	88047190	1,6-Octadien-3-ol, 3,7-dimethyl-	4.10463	4.10463
Decanoic acid, ethyl ester	30625135	Decanoic acid, ethyl ester	1.73	1.73		Decanoic acid, ethyl ester	3.12602e+07	Decanoic acid, ethyl ester	1.73	1.73		Decanoic acid, ethyl ester	37109678	Decanoic acid, ethyl ester	1.73	1.73
ck3						S2.2-3						S2.9-3
Eucalyptol	117749451	Eucalyptol	5.32406	5.32406		Eucalyptol	53739741	Eucalyptol	2.69619	2.69619		Eucalyptol	74827129	Eucalyptol	3.7749	3.7749
ocimene	15123408	1,3,6-Octatriene, 3,7-dimethyl-, (E)-	0.683807	17.8936		ocimene	2601741	1,3,6-Octatriene, 3,7-dimethyl-, (Z)-	0.130533	8.38517		ocimene	6630787	1,3,6-Octatriene, 3,7-dimethyl-, (E)-	0.334512	11.4391
	380618985	1,3,6-Octatriene, 3,7-dimethyl-	17.2097				159955616	1,3,6-Octatriene, 3,7-dimethyl-	8.02518				220119338	1,3,6-Octatriene, 3,7-dimethyl-	11.1046
							4573464	1,3,6-Octatriene, 3,8-dimethyl-	0.229457
linalool	181634975	1,6-Octadien-3-ol, 3,7-dimethyl-	8.21265	8.21265		linalool	86566572	1,6-Octadien-3-ol, 3,7-dimethyl-	4.34316	4.34316		linalool	80994782	1,6-Octadien-3-ol, 3,7-dimethyl-	4.08604	4.08604
Decanoic acid, ethyl ester	38261514	Decanoic acid, ethyl ester	1.73	1.73		Decanoic acid, ethyl ester	34481867	Decanoic acid, ethyl ester	1.73	1.73		Decanoic acid, ethyl ester	34292575		1.73	1.73
